# Supplementary material for: Can drinking water, sanitation, handwashing, and nutritional interventions reduce antibiotic use in young children?
Source: bioRxiv or medRxiv preprint supplement (doi:10.1101/2024.05.10.24307069), 2024-05-10

# Can drinking water, sanitation, handwashing, and nutritional interventions reduce antibiotic use in young children?

## Supplemental Information

### Table of Contents

| Item                                                                                                                                                 | Pages |
|------------------------------------------------------------------------------------------------------------------------------------------------------|-------|
| <b>Table S1.</b> CONSORT Checklist                                                                                                                   | 2-3   |
| <b>Table S2.</b> Enrollment characteristics by intervention group within the EED substudy and the WASH Benefits parent trial in Bangladesh           | 4     |
| <b>Table S3.</b> Enrollment characteristics by intervention group within the EED substudy and the WASH Benefits parent trial in Kenya                | 5     |
| <b>Table S4.</b> Enrollment characteristics of children in the EED substudy included in follow-up vs. lost to follow-up in Bangladesh                | 6     |
| <b>Table S5.</b> Enrollment characteristics of children in the EED substudy included in follow-up vs. lost to follow-up in Kenya                     | 7     |
| <b>Table S6.</b> Caregiver-reported antibiotic use in last 3 months by young children in subgroups of age and sex, Bangladesh                        | 8     |
| <b>Table S7.</b> Caregiver-reported antibiotic use in last 3 months by young children in subgroups of age and sex, Kenya                             | 9     |
| <b>Table S8.</b> WSH, nutrition and N+WSH interventions vs. controls on antibiotic use within last 3 months among children in Bangladesh             | 10    |
| <b>Table S9.</b> Combined N+WSH intervention vs. WSH and nutrition interventions on antibiotic use within last 3 months among children in Bangladesh | 11    |
| <b>Table S10.</b> WSH, nutrition and N+WSH interventions vs. controls on antibiotic use within last 3 months among children in Kenya                 | 12    |
| <b>Table S11.</b> Combined N+WSH intervention vs. WSH and nutrition interventions on antibiotic use within last 3 months among children in Kenya     | 13    |
| <b>Table S12.</b> Multiplicative interaction by age and sex for unadjusted intervention effects on antibiotic use within last 3 months, Bangladesh   | 14    |
| <b>Table S13.</b> Additive interaction by age and sex for unadjusted intervention effects on antibiotic use within last 3 months, Bangladesh         | 15    |
| <b>Table S14.</b> Multiplicative interaction by age and sex for unadjusted intervention effects on antibiotic use within last 3 months, Kenya        | 16    |
| <b>Table S15.</b> Additive interaction by age and sex for unadjusted intervention effects on antibiotic use within last 3 months, Kenya              | 17    |
| <b>Table S16.</b> Sensitivity analysis, unadjusted intervention effects on antibiotic use within last 2 weeks and last month, Bangladesh*            | 18    |
| <b>Figure S1.</b> CONSORT Diagram for the WASH Benefits Bangladesh environmental enteric dysfunction substudy                                        | 19    |
| <b>Figure S2.</b> CONSORT Diagram for the WASH Benefits Kenya environmental enteric dysfunction substudy                                             | 20    |

**Table S1. CONSORT Checklist**

| Item                             | Description                                                                                                                                                                                                                                                                                                                                                                              | Reported in Section                                                                                  |
|----------------------------------|------------------------------------------------------------------------------------------------------------------------------------------------------------------------------------------------------------------------------------------------------------------------------------------------------------------------------------------------------------------------------------------|------------------------------------------------------------------------------------------------------|
| <b>Title and Abstract</b>        |                                                                                                                                                                                                                                                                                                                                                                                          |                                                                                                      |
| 1a                               | Identification as a randomized trial in the title; Identification as a cluster randomized trial in the title                                                                                                                                                                                                                                                                             | Title                                                                                                |
| 1b                               | Structured summary of trial design, methods, results, and conclusions                                                                                                                                                                                                                                                                                                                    | Abstract                                                                                             |
| <b>Introduction</b>              |                                                                                                                                                                                                                                                                                                                                                                                          |                                                                                                      |
| Background and Objectives        |                                                                                                                                                                                                                                                                                                                                                                                          |                                                                                                      |
| 2a                               | Scientific background and explanation of rationale; Rationale for using a cluster design                                                                                                                                                                                                                                                                                                 | Introduction (paragraph 1)                                                                           |
| 2b                               | Specific objectives or hypotheses; Whether objectives pertain to the cluster level, the individual participant level, or both                                                                                                                                                                                                                                                            | Introduction (paragraph 2)                                                                           |
| <b>Methods</b>                   |                                                                                                                                                                                                                                                                                                                                                                                          |                                                                                                      |
| Trial Design                     |                                                                                                                                                                                                                                                                                                                                                                                          |                                                                                                      |
| 3a                               | Description of trial design (such as parallel, factorial) including allocation ratio; Definition of cluster and description of how the design features apply to the clusters                                                                                                                                                                                                             | Methods: Study design, Data collection (paragraph 1)                                                 |
| 3b                               | Important changes to methods after trial commencement (such as eligibility criteria), with reasons                                                                                                                                                                                                                                                                                       | N/A                                                                                                  |
| Participants                     |                                                                                                                                                                                                                                                                                                                                                                                          |                                                                                                      |
| 4a                               | Eligibility criteria for participants; Eligibility criteria for clusters                                                                                                                                                                                                                                                                                                                 | Methods: Study design                                                                                |
| 4b                               | Settings and locations where the data were collected                                                                                                                                                                                                                                                                                                                                     | Methods: Study design                                                                                |
| Interventions                    |                                                                                                                                                                                                                                                                                                                                                                                          |                                                                                                      |
| 5                                | The interventions for each group with sufficient details to allow replication, including how and when they were actually administered; Whether interventions pertain to the cluster level, the individual participant level, or both                                                                                                                                                     | Methods: Study design, Interventions (paragraph 1)                                                   |
| Outcomes                         |                                                                                                                                                                                                                                                                                                                                                                                          |                                                                                                      |
| 6a                               | Completely defined pre-specified primary and secondary outcome measures, including how and when they were assessed; Whether outcome measures pertain to the cluster level, the individual participant level, or both                                                                                                                                                                     | Methods: Data collection (paragraph 2), Statistical parameters and estimation strategy (paragraph 1) |
| 6b                               | Any changes to trial outcomes after the trial commenced, with reasons                                                                                                                                                                                                                                                                                                                    | N/A                                                                                                  |
| Sample Size                      |                                                                                                                                                                                                                                                                                                                                                                                          |                                                                                                      |
| 7a                               | How sample size was determined; Method of calculation, number of cluster(s) (and whether equal or unequal cluster sizes are assumed), cluster size, a coefficient of intracluster correlation (ICC or $k$ ), and an indication of its uncertainty                                                                                                                                        | Methods: Minimum detectable effect size                                                              |
| 7b                               | When applicable, explanation of any interim analyses and stopping guidelines                                                                                                                                                                                                                                                                                                             | N/A                                                                                                  |
| <b>Randomization</b>             |                                                                                                                                                                                                                                                                                                                                                                                          |                                                                                                      |
| Sequence Generation              |                                                                                                                                                                                                                                                                                                                                                                                          |                                                                                                      |
| 8a                               | Method used to generate the random allocation sequence                                                                                                                                                                                                                                                                                                                                   | Methods: Study design                                                                                |
| 8b                               | Type of randomization; details of any restriction (such as blocking and block size); Details of stratification or matching if used                                                                                                                                                                                                                                                       | Methods: Study design                                                                                |
| Allocation Concealment Mechanism |                                                                                                                                                                                                                                                                                                                                                                                          |                                                                                                      |
| 9                                | Mechanism used to implement the random allocation sequence (such as sequentially numbered containers), describing any steps taken to conceal the sequence until interventions were assigned; Specification that allocation was based on clusters rather than individuals and whether allocation concealment (if any) was at the cluster level, the individual participant level, or both | Methods: Study design                                                                                |
| Implementation                   |                                                                                                                                                                                                                                                                                                                                                                                          |                                                                                                      |
| 10a                              | Who generated the random allocation sequence, who enrolled clusters, and who assigned clusters to interventions                                                                                                                                                                                                                                                                          | Methods: Study design                                                                                |
| 10b                              | Mechanism by which individual participants were included in clusters for the purposes of the trial (such as complete enumeration, random sampling)                                                                                                                                                                                                                                       | Methods: Study design                                                                                |
| 10c                              | From whom consent was sought (representatives of the cluster, or individual cluster members, or both) and whether consent was sought before or after randomization                                                                                                                                                                                                                       | Methods: Ethics                                                                                      |
| Blinding                         |                                                                                                                                                                                                                                                                                                                                                                                          |                                                                                                      |
| 11a                              | If done, who was blinded after assignment to interventions (for example, participants, care providers, those assessing outcomes) <sup>[11]</sup> and how                                                                                                                                                                                                                                 | Methods: Data collection (paragraph 2)                                                               |
| 11b                              | If relevant, description of the similarity of interventions                                                                                                                                                                                                                                                                                                                              | N/A                                                                                                  |

| Item                       | Description                                                                                                                                                                                                                                                                                     | Reported in Section                                                                                            |
|----------------------------|-------------------------------------------------------------------------------------------------------------------------------------------------------------------------------------------------------------------------------------------------------------------------------------------------|----------------------------------------------------------------------------------------------------------------|
| <b>Statistical Methods</b> |                                                                                                                                                                                                                                                                                                 |                                                                                                                |
| 12a                        | Statistical methods used to compare groups for primary and secondary outcomes; How clustering was taken into account                                                                                                                                                                            | Methods: Statistical parameters and estimation strategy (paragraph 2)                                          |
| 12b                        | Methods for additional analyses, such as subgroup analyses and adjusted analyses                                                                                                                                                                                                                | Methods: Statistical parameters and estimation strategy (paragraph 2), Subgroup analyses, Sensitivity analyses |
| <b>Results</b>             |                                                                                                                                                                                                                                                                                                 |                                                                                                                |
| Participant Flow           |                                                                                                                                                                                                                                                                                                 |                                                                                                                |
| 13a                        | For each group, the numbers of participants/clusters who were randomly assigned, received intended treatment, and were analyzed for the primary outcome                                                                                                                                         | Results: Enrollment, Fig S1, Fig S2                                                                            |
| 13b                        | For each group, losses and exclusions after randomization, together with reasons, for both clusters and individual cluster members                                                                                                                                                              | Results: Enrollment, Fig S1, Fig S2                                                                            |
| Recruitment                |                                                                                                                                                                                                                                                                                                 |                                                                                                                |
| 14a                        | Dates defining the periods of recruitment and follow-up                                                                                                                                                                                                                                         | Results: Enrollment                                                                                            |
| 14b                        | Why the trial ended or was stopped                                                                                                                                                                                                                                                              | N/A                                                                                                            |
| Baseline Data              |                                                                                                                                                                                                                                                                                                 |                                                                                                                |
| 15                         | A table showing baseline demographic and clinical characteristics for each group; Baseline characteristics for the individual and cluster levels as applicable for each group                                                                                                                   | Tables S2, S3                                                                                                  |
| Numbers Analyzed           |                                                                                                                                                                                                                                                                                                 |                                                                                                                |
| 16                         | For each group, number of participants/clusters (denominator) included in each analysis and whether the analysis was by the original assigned groups                                                                                                                                            | Statistical parameters and estimation strategy (paragraph 2), Tables S6, S7                                    |
| Outcomes and Estimation    |                                                                                                                                                                                                                                                                                                 |                                                                                                                |
| 17a                        | For each primary and secondary outcome, results for each group, and the estimated effect size and its precision (such as 95% confidence interval); Results at the individual and cluster levels as applicable and a coefficient of intracluster correlation (ICC or k) for each primary outcome | Results: Intervention effects on antibiotic use, Fig 1, Fig2, Tables S8-S11                                    |
| 17b                        | For binary outcome, presentation of both absolute and relative effect sizes is recommended                                                                                                                                                                                                      | Results: Intervention effects on antibiotic use, Tables S8-S11                                                 |
| Ancillary Analyses         |                                                                                                                                                                                                                                                                                                 |                                                                                                                |
| 18                         | Results of any other analyses performed, including subgroup analyses and adjusted analyses, distinguishing pre-specified from exploratory                                                                                                                                                       | Results: Subgroup analyses, Secondary and sensitivity analyses, Fig 3, Fig 4, Tables S12-S16                   |
| Harms                      |                                                                                                                                                                                                                                                                                                 |                                                                                                                |
| 19                         | All important harms or unintended effects in each group                                                                                                                                                                                                                                         | N/A                                                                                                            |
| <b>Discussion</b>          |                                                                                                                                                                                                                                                                                                 |                                                                                                                |
| Limitations                |                                                                                                                                                                                                                                                                                                 |                                                                                                                |
| 20                         | Trial limitations, addressing sources of potential bias, imprecision and, if relevant, multiplicity of analyses                                                                                                                                                                                 | Discussion                                                                                                     |
| Generalizability           |                                                                                                                                                                                                                                                                                                 |                                                                                                                |
| 21                         | Generalizability (external validity, applicability) of the trial findings; Generalizability to clusters and/or individual participants (as relevant)                                                                                                                                            | Discussion                                                                                                     |
| Interpretation             |                                                                                                                                                                                                                                                                                                 |                                                                                                                |
| 22                         | Interpretation consistent with results, balancing benefits and harms, and considering other relevant evidence                                                                                                                                                                                   | Discussion                                                                                                     |
| <b>Other Information</b>   |                                                                                                                                                                                                                                                                                                 |                                                                                                                |
| Registration               |                                                                                                                                                                                                                                                                                                 |                                                                                                                |
| 23                         | Registration number and name of trial registry                                                                                                                                                                                                                                                  | Methods: Study design                                                                                          |
| Protocol                   |                                                                                                                                                                                                                                                                                                 |                                                                                                                |
| 24                         | Where the full trial protocol can be accessed, if available                                                                                                                                                                                                                                     | N/A                                                                                                            |
| Funding                    |                                                                                                                                                                                                                                                                                                 |                                                                                                                |
| 25                         | Sources of funding and other support (such as supply of drugs), role of funders                                                                                                                                                                                                                 | Funding                                                                                                        |

**Table S2.** Enrollment characteristics by intervention group within the EED substudy and the WASH Benefits parent trial in Bangladesh

|                                                 | EED substudy |           |           |           | WASH Benefits parent trial |             |             |             |
|-------------------------------------------------|--------------|-----------|-----------|-----------|----------------------------|-------------|-------------|-------------|
|                                                 | C            | WSH       | N         | N+WSH     | C                          | WSH         | N           | N+WSH       |
| Number of compounds                             | 454          | 429       | 450       | 450       | 1382                       | 698         | 699         | 686         |
| <b>Socio-demographics</b>                       |              |           |           |           |                            |             |             |             |
| Mother's age in years, mean (SD)                | 23 (5)       | 24 (5)    | 24 (5)    | 24 (5)    | 24 (5)                     | 24 (5)      | 24 (5)      | 24 (6)      |
| Mother's years of education, mean (SD)          | 7 (3)        | 6 (3)     | 6 (4)     | 6 (3)     | 6 (3)                      | 6 (3)       | 6 (3)       | 6 (3)       |
| Father's years of education, mean (SD)          | 5 (4)        | 5 (4)     | 5 (4)     | 5 (4)     | 5 (4)                      | 5 (4)       | 5 (4)       | 5 (4)       |
| Father works in agriculture, % (n)              | 23% (104)    | 29% (128) | 34% (148) | 28% (127) | 30% (414)                  | 31% (216)   | 33% (232)   | 30% (207)   |
| Number of people in household, mean (SD)        | 5 (2)        | 5 (2)     | 5 (2)     | 5 (2)     | 5 (2)                      | 5 (2)       | 5 (2)       | 5 (2)       |
| Has electricity, % (n)                          | 60% (269)    | 62% (278) | 62% (269) | 61% (272) | 57% (784)                  | 61% (426)   | 59% (409)   | 60% (412)   |
| Has cement floor, % (n)                         | 17% (75)     | 12% (55)  | 11% (50)  | 12% (53)  | 10% (145)                  | 11% (77)    | 10% (67)    | 10% (72)    |
| Acres of agricultural land owned, mean (SD)     | 0 (0)        | 0 (0)     | 0 (0)     | 0 (0)     | 0.15 (0.21)                | 0.15 (0.23) | 0.16 (0.27) | 0.14 (0.38) |
| <b>Drinking water</b>                           |              |           |           |           |                            |             |             |             |
| Primary water source is shallow tubewell, % (n) | 73% (329)    | 76% (338) | 71% (309) | 71% (318) | 75% (1038)                 | 78% (546)   | 74% (519)   | 73% (504)   |
| Stored water observed at home, % (n)            | 51% (230)    | 45% (200) | 48% (209) | 51% (229) | 48% (666)                  | 43% (304)   | 43% (301)   | 48% (331)   |
| Reported treating water yesterday, % (n)        | 0% (1)       | 0% (0)    | 0% (0)    | 0% (1)    | 0% (4)                     | 0% (0)      | 0% (0)      | 0% (2)      |
| Distance to water source in minutes, mean (SD)  | 1 (2)        | 1 (6)     | 1 (2)     | 1 (2)     | 1 (3)                      | 1 (5)       | 1 (3)       | 1 (2)       |
| <b>Sanitation</b>                               |              |           |           |           |                            |             |             |             |
| Reported daily open defecation                  |              |           |           |           |                            |             |             |             |
| Adult men, % (n)                                | 4% (19)      | 7% (30)   | 9% (38)   | 9% (38)   | 7% (97)                    | 8% (54)     | 9% (59)     | 7% (50)     |
| Adult women, % (n)                              | 3% (12)      | 4% (16)   | 5% (23)   | 5% (21)   | 4% (62)                    | 4% (29)     | 6% (39)     | 4% (24)     |
| Children 8-15 yrs, % (n)                        | 5% (9)       | 8% (17)   | 8% (13)   | 11% (22)  | 10% (53)                   | 10% (30)    | 8% (23)     | 10% (28)    |
| Children 3-8 yrs, % (n)                         | 30% (64)     | 37% (90)  | 40% (90)  | 37% (92)  | 38% (267)                  | 38% (137)   | 39% (129)   | 37% (134)   |
| Children <3 yrs, % (n)                          | 72% (71)     | 75% (73)  | 80% (68)  | 88% (79)  | 82% (245)                  | 79% (123)   | 85% (128)   | 88% (123)   |
| Latrine                                         |              |           |           |           |                            |             |             |             |
| Owned by household, % (n)                       | 60% (271)    | 55% (244) | 54% (234) | 51% (230) | 54% (750)                  | 53% (373)   | 54% (377)   | 53% (367)   |
| Has concrete slab, % (n)                        | 97% (426)    | 93% (401) | 93% (382) | 94% (399) | 95% (1251)                 | 93% (620)   | 94% (620)   | 94% (621)   |
| Has functional water seal, % (n)                | 38% (157)    | 26% (95)  | 32% (114) | 31% (111) | 31% (358)                  | 26% (152)   | 31% (183)   | 27% (155)   |
| Owns child potty                                | 8% (37)      | 4% (20)   | 6% (27)   | 5% (21)   | 4% (61)                    | 4% (27)     | 5% (36)     | 4% (30)     |
| Human feces observed                            |              |           |           |           |                            |             |             |             |
| In house, % (n)                                 | 6% (25)      | 8% (36)   | 9% (41)   | 8% (36)   | 8% (114)                   | 7% (48)     | 8% (58)     | 7% (49)     |
| In child's play area, % (n)                     | 1% (5)       | 1% (4)    | 2% (7)    | 1% (6)    | 2% (21)                    | 1% (7)      | 1% (8)      | 1% (7)      |
| <b>Handwashing</b>                              |              |           |           |           |                            |             |             |             |
| Within 6 steps of latrine                       |              |           |           |           |                            |             |             |             |
| Has water, % (n)                                | 21% (84)     | 13% (51)  | 10% (38)  | 13% (54)  | 14% (178)                  | 10% (67)    | 10% (62)    | 11% (72)    |
| Has soap, % (n)                                 | 7% (88)      | 7% (42)   | 5% (32)   | 6% (36)   | 11% (45)                   | 8% (32)     | 6% (23)     | 7% (27)     |
| Within 6 steps of kitchen                       |              |           |           |           |                            |             |             |             |
| Has water, % (n)                                | 12% (48)     | 10% (4)   | 11% (43)  | 10% (42)  | 9% (118)                   | 9% (61)     | 9% (61)     | 9% (60)     |
| Has soap, % (n)                                 | 4% (18)      | 3% (11)   | 5% (19)   | 3% (14)   | 3% (33)                    | 2% (15)     | 4% (23)     | 3% (18)     |
| <b>Nutrition</b>                                |              |           |           |           |                            |             |             |             |
| Household is food secure, % (n)                 | 71% (485)    | 74% (331) | 67% (298) | 71% (308) | 67% (932)                  | 69% (482)   | 69% (479)   | 71% (485)   |

**Table S3.** Enrollment characteristics by intervention group within the EED substudy and the WASH Benefits parent trial in Kenya

|                                                    | EED substudy |           |           |           | WASH Benefits parent trial |           |           |           |
|----------------------------------------------------|--------------|-----------|-----------|-----------|----------------------------|-----------|-----------|-----------|
|                                                    | C            | WSH       | N         | N+WSH     | C                          | WSH       | N         | N+WSH     |
| Number of compounds                                | 511          | 456       | 434       | 448       | 1919                       | 912       | 843       | 921       |
| <b>Socio-demographics</b>                          |              |           |           |           |                            |           |           |           |
| Mother's age in years, mean (SD)                   | 26 (6)       | 26 (6)    | 26 (6)    | 26 (6)    | 26 (6)                     | 26 (6)    | 26 (6)    | 26 (6)    |
| Mother completed at least primary education, % (n) | 45% (227)    | 44% (200) | 50% (215) | 49% (217) | 48% (916)                  | 47% (430) | 49% (409) | 48% (438) |
| Father completed at least primary education, % (n) | 59% (279)    | 59% (252) | 61% (248) | 62% (258) | 62% (1098)                 | 61% (521) | 64% (491) | 62% (526) |
| Father works in agriculture, % (n)                 | 47% (231)    | 45% (197) | 49% (201) | 44% (187) | 41% (749)                  | 43% (374) | 43% (343) | 43% (372) |
| Number of people in compound, mean (SD)            | 9 (6)        | 9 (5)     | 9 (6)     | 9 (6)     | 8 (5)                      | 8 (5)     | 8 (7)     | 8 (5)     |
| Has electricity, % (n)                             | 4% (22)      | 8% (35)   | 7% (30)   | 6% (25)   | 6% (122)                   | 7% (64)   | 7% (58)   | 7% (67)   |
| Has cement floor, % (n)                            | 5% (25)      | 5% (25)   | 5% (20)   | 4% (19)   | 6% (107)                   | 5% (50)   | 6% (48)   | 6% (56)   |
| Has iron roof, % (n)                               | 60% (305)    | 59% (271) | 66% (285) | 62% (279) | 68% (1302)                 | 63% (574) | 69% (581) | 67% (615) |
| <b>Drinking water</b>                              |              |           |           |           |                            |           |           |           |
| Primary water source is improved, % (n)            | 79% (402)    | 71% (324) | 71% (308) | 80% (355) | 76% (1446)                 | 69% (624) | 72% (603) | 76% (697) |
| Reported treating currently stored water, % (n)    | 10% (43)     | 13% (46)  | 8% (27)   | 13% (46)  | 13% (196)                  | 13% (97)  | 12% (79)  | 14% (106) |
| Distance to water source in minutes, mean (SD)     | 10 (10)      | 10 (11)   | 10 (11)   | 10 (12)   | 11 (12)                    | 11 (13)   | 11 (12)   | 11 (12)   |
| <b>Sanitation</b>                                  |              |           |           |           |                            |           |           |           |
| Children <3 yrs daily defecate in the open, % (n)  | 77% (230)    | 76% (195) | 78% (188) | 79% (187) | 78% (789)                  | 77% (394) | 79% (363) | 78% (388) |
| Household owns latrine, % (n)                      | 81% (415)    | 86% (390) | 85% (370) | 86% (384) | 82% (1561)                 | 83% (754) | 83% (701) | 83% (764) |
| Access to improved latrine, % (n)                  | 17% (82)     | 17% (75)  | 16% (66)  | 15% (65)  | 17% (309)                  | 18% (153) | 15% (119) | 16% (143) |
| Human feces observed in compound, % (n)            | 7% (36)      | 9% (39)   | 9% (40)   | 9% (42)   | 9% (163)                   | 8% (73)   | 9% (73)   | 9% (87)   |
| <b>Handwashing location</b>                        |              |           |           |           |                            |           |           |           |
| Has water within 2 m, % (n)                        | 24% (121)    | 28% (127) | 27% (117) | 27% (121) | 25% (487)                  | 28% (251) | 27% (228) | 27% (249) |
| Has soap within 2 m, % (n)                         | 8% (40)      | 13% (61)  | 11% (46)  | 10% (46)  | 9% (164)                   | 13% (115) | 11% (90)  | 9% (87)   |
| <b>Nutrition</b>                                   |              |           |           |           |                            |           |           |           |
| Moderate to severe household hunger, % (n)         | 11% (55)     | 9% (41)   | 12% (54)  | 11% (47)  | 11% (203)                  | 11% (101) | 12% (98)  | 11% (104) |

**Table S4.** Enrollment characteristics of children in the EED substudy included in follow-up vs. lost to follow-up in Bangladesh

|                                                 | Included   | Missing from follow-up at age 14 months | Missing from follow-up at age 28 months |
|-------------------------------------------------|------------|-----------------------------------------|-----------------------------------------|
| Number of compounds                             | 1778       | 284                                     | 273                                     |
| <b>Socio-demographics</b>                       |            |                                         |                                         |
| Mother's age in years, mean (SD)                | 24 (5)     | 24 (5)                                  | 24 (5)                                  |
| Mother's years of education, mean (SD)          | 6 (3)      | 6 (3)                                   | 6 (3)                                   |
| Father's years of education, mean (SD)          | 5 (4)      | 5 (4)                                   | 5 (4)                                   |
| Father works in agriculture, % (n)              | 29% (507)  | 24% (69)                                | 26% (70)                                |
| Number of people in household, mean (SD)        | 5 (2)      | 5 (2)                                   | 5 (2)                                   |
| Has electricity, % (n)                          | 61% (1088) | 60% (169)                               | 56% (153)                               |
| Has cement floor, % (n)                         | 13% (233)  | 14% (40)                                | 15% (42)                                |
| Acres of agricultural land owned, mean (SD)     | 0 (0)      | 0 (0)                                   | 0 (0)                                   |
| <b>Drinking water</b>                           |            |                                         |                                         |
| Primary water source is shallow tubewell, % (n) | 73% (1294) | 70% (200)                               | 70% (191)                               |
| Stored water observed at home, % (n)            | 49% (868)  | 51% (144)                               | 52% (142)                               |
| Reported treating water yesterday, % (n)        | 0% (2)     | 0% (0)                                  | 0% (0)                                  |
| Distance to water source in minutes, mean (SD)  | 1 (3)      | 1 (2)                                   | 1 (1)                                   |
| <b>Sanitation</b>                               |            |                                         |                                         |
| Reported daily open defecation                  |            |                                         |                                         |
| Adult men, % (n)                                | 7% (125)   | 8% (21)                                 | 7% (18)                                 |
| Adult women, % (n)                              | 4% (72)    | 5% (14)                                 | 3% (9)                                  |
| Children 8-15 yrs, % (n)                        | 8% (61)    | 11% (12)                                | 14% (15)                                |
| Children 3-8 yrs, % (n)                         | 36% (337)  | 39% (57)                                | 37% (51)                                |
| Children <3 yrs, % (n)                          | 79% (291)  | 83% (45)                                | 81% (38)                                |
| Latrine                                         |            |                                         |                                         |
| Owned by household, % (n)                       | 55% (979)  | 52% (148)                               | 56% (154)                               |
| Has concrete slab, % (n)                        | 94% (1608) | 96% (258)                               | 95% (249)                               |
| Has functional water seal, % (n)                | 32% (477)  | 31% (73)                                | 36% (84)                                |
| Owns child potty                                | 6% (105)   | 7% (20)                                 | 7% (20)                                 |
| Human feces observed                            |            |                                         |                                         |
| In house, % (n)                                 | 8% (138)   | 4% (12)                                 | 7% (18)                                 |
| In child's play area, % (n)                     | 1% (22)    | 1% (3)                                  | 2% (6)                                  |
| <b>Handwashing</b>                              |            |                                         |                                         |
| Within 6 steps of latrine                       |            |                                         |                                         |
| Has water, % (n)                                | 14% (227)  | 16% (42)                                | 16% (40)                                |
| Has soap, % (n)                                 | 8% (127)   | 10% (27)                                | 11% (27)                                |
| Within 6 steps of kitchen                       |            |                                         |                                         |
| Has water, % (n)                                | 11% (173)  | 12% (30)                                | 9% (21)                                 |
| Has soap, % (n)                                 | 4% (62)    | 5% (12)                                 | 2% (5)                                  |
| <b>Nutrition</b>                                |            |                                         |                                         |
| Household is food secure, % (n)                 | 71% (1254) | 68% (192)                               | 68% (187)                               |

**Table S5.** Enrollment characteristics of children in the EED substudy included in follow-up vs. lost to follow-up in Kenya

|                                                    | Included   | Missing from follow-up at age 17 months | Missing from follow-up at age 22 months |
|----------------------------------------------------|------------|-----------------------------------------|-----------------------------------------|
| Number of compounds                                | 1849       | 462                                     | 556                                     |
| <b>Socio-demographics</b>                          |            |                                         |                                         |
| Mother's age in years, mean (SD)                   | 26 (6)     | 25 (6)                                  | 25 (6)                                  |
| Mother completed at least primary education, % (n) | 47% (859)  | 49% (225)                               | 49% (271)                               |
| Father completed at least primary education, % (n) | 60% (1037) | 62% (267)                               | 61% (310)                               |
| Father works in agriculture, % (n)                 | 46% (816)  | 42% (181)                               | 43% (223)                               |
| Number of people in compound, mean (SD)            | 9 (6)      | 8 (6)                                   | 8 (5)                                   |
| Has electricity, % (n)                             | 6% (112)   | 7% (31)                                 | 6% (33)                                 |
| Has cement floor, % (n)                            | 5% (89)    | 6% (27)                                 | 5% (29)                                 |
| Has iron roof, % (n)                               | 62% (1140) | 60% (279)                               | 61% (341)                               |
| <b>Drinking water</b>                              |            |                                         |                                         |
| Primary water source is improved, % (n)            | 75% (1389) | 74% (340)                               | 76% (424)                               |
| Reported treating currently stored water, % (n)    | 11% (162)  | 11% (39)                                | 12% (54)                                |
| Distance to water source in minutes, mean (SD)     | 10 (11)    | 10 (9)                                  | 10 (11)                                 |
| <b>Sanitation</b>                                  |            |                                         |                                         |
| Children <3 yrs daily defecate in the open, % (n)  | 78% (800)  | 77% (178)                               | 71% (205)                               |
| Household owns latrine, % (n)                      | 84% (1559) | 81% (375)                               | 82% (454)                               |
| Access to improved latrine, % (n)                  | 16% (288)  | 19% (83)                                | 18% (93)                                |
| Human feces observed in compound, % (n)            | 9% (157)   | 9% (40)                                 | 10% (55)                                |
| <b>Handwashing location</b>                        |            |                                         |                                         |
| Has water within 2 m, % (n)                        | 26% (486)  | 26% (122)                               | 27% (148)                               |
| Has soap within 2 m, % (n)                         | 10% (193)  | 11% (52)                                | 10% (58)                                |
| <b>Nutrition</b>                                   |            |                                         |                                         |
| Moderate to severe household hunger, % (n)         | 11% (197)  | 14% (65)                                | 11% (59)                                |

**Table S6.** Caregiver-reported antibiotic use in last 3 months by young children in subgroups of age and sex, Bangladesh

| Arm                             | All observations |             | Mean child age |             |           |             |           |             | Sex    |             |      |             |
|---------------------------------|------------------|-------------|----------------|-------------|-----------|-------------|-----------|-------------|--------|-------------|------|-------------|
|                                 | N                | % (n)       | 3 months       |             | 14 months |             | 28 months |             | Female |             | Male |             |
|                                 |                  |             | N              | % (n)       | N         | % (n)       | N         | % (n)       | N      | % (n)       | N    | % (n)       |
| Used antibiotics $\geq 1$ time  |                  |             |                |             |           |             |           |             |        |             |      |             |
| C                               | 1005             | 63.2 (635)  | 270            | 54.1 (146)  | 377       | 75.1 (283)  | 358       | 57.5 (206)  | 515    | 62.3 (321)  | 490  | 64.1 (314)  |
| WSH                             | 1077             | 57.0 (614)  | 285            | 45.6 (130)  | 395       | 70.6 (279)  | 397       | 51.6 (205)  | 510    | 54.7 (279)  | 567  | 59.1 (335)  |
| N                               | 1018             | 54.1 (551)  | 269            | 41.3 (111)  | 377       | 68.2 (257)  | 372       | 49.2 (183)  | 492    | 49.6 (244)  | 526  | 58.4 (307)  |
| N+WSH                           | 1058             | 54.2 (573)  | 278            | 36.0 (100)  | 379       | 71.5 (271)  | 401       | 50.4 (202)  | 565    | 49.7 (281)  | 493  | 59.2 (292)  |
| Used antibiotics $\geq 2$ times |                  |             |                |             |           |             |           |             |        |             |      |             |
| C                               | 1005             | 24.7 (248)  | 270            | 24.8 (67)   | 377       | 34.8 (131)  | 358       | 14.0 (50)   | 515    | 22.1 (114)  | 490  | 27.4 (134)  |
| WSH                             | 1077             | 18.2 (196)  | 285            | 14.0 (40)   | 395       | 25.6 (101)  | 397       | 13.9 (55)   | 510    | 15.9 (81)   | 567  | 20.3 (115)  |
| N                               | 1018             | 16.4 (167)  | 269            | 12.6 (34)   | 377       | 24.4 (92)   | 372       | 11.0 (41)   | 492    | 15.7 (77)   | 526  | 17.1 (90)   |
| N+WSH                           | 1058             | 16.2 (171)  | 278            | 11.9 (33)   | 379       | 26.9 (102)  | 401       | 9.0 (36)    | 565    | 14.5 (82)   | 493  | 18.1 (89)   |
| Arm                             | N                | Mean (SD)   | N              | Mean (SD)   | N         | Mean (SD)   | N         | Mean (SD)   | N      | Mean (SD)   | N    | Mean (SD)   |
| Episodes of antibiotic use      |                  |             |                |             |           |             |           |             |        |             |      |             |
| C                               | 1005             | 0.98 (0.98) | 270            | 0.90 (1.06) | 377       | 1.23 (0.99) | 358       | 0.77 (0.84) | 515    | 0.92 (0.94) | 490  | 1.03 (1.02) |
| WSH                             | 1077             | 0.81 (0.88) | 285            | 0.65 (0.87) | 395       | 1.05 (0.93) | 397       | 0.68 (0.78) | 510    | 0.74 (0.81) | 567  | 0.87 (0.93) |
| N                               | 1018             | 0.77 (0.90) | 269            | 0.58 (0.82) | 377       | 1.04 (0.99) | 372       | 0.64 (0.79) | 492    | 0.70 (0.86) | 526  | 0.84 (0.93) |
| N+WSH                           | 1058             | 0.77 (0.89) | 278            | 0.56 (0.93) | 379       | 1.08 (0.95) | 401       | 0.61 (0.71) | 565    | 0.70 (0.87) | 493  | 0.84 (0.91) |
| Total days of antibiotic use    |                  |             |                |             |           |             |           |             |        |             |      |             |
| C                               | 995              | 5.06 (5.81) | 265            | 4.77 (6.36) | 373       | 6.27 (5.91) | 357       | 4.01 (4.99) | 511    | 4.77 (5.58) | 484  | 5.37 (6.03) |
| WSH                             | 1075             | 4.12 (5.05) | 283            | 3.54 (5.18) | 395       | 5.13 (5.20) | 397       | 3.52 (4.64) | 509    | 3.82 (4.83) | 566  | 4.39 (5.22) |
| N                               | 1016             | 4.02 (5.30) | 268            | 3.00 (4.84) | 376       | 5.34 (5.74) | 372       | 3.41 (4.86) | 492    | 3.67 (5.15) | 524  | 4.34 (5.41) |
| N+WSH                           | 1055             | 4.05 (5.39) | 276            | 3.25 (6.01) | 379       | 5.70 (5.88) | 400       | 3.04 (3.86) | 564    | 3.65 (5.14) | 491  | 4.52 (5.63) |

C: Control; WSH: Water, sanitation, hygiene; N: Nutrition, N+WSH: Nutrition+ water, sanitation, hygiene; SD: Standard deviation.



**Table S7.** Caregiver-reported antibiotic use in last 3 months by young children in subgroups of age and sex, Kenya

|                              | All observations |             | Mean child age |             |           |             |           |             | Sex    |             |      |             |
|------------------------------|------------------|-------------|----------------|-------------|-----------|-------------|-----------|-------------|--------|-------------|------|-------------|
|                              |                  |             | 6 months       |             | 17 months |             | 22 months |             | Female |             | Male |             |
| Arm                          | N                | % (n)       | N              | % (n)       | N         | % (n)       | N         | % (n)       | N      | % (n)       | N    | % (n)       |
| Used antibiotics ≥1 time     |                  |             |                |             |           |             |           |             |        |             |      |             |
| C                            | 1143             | 52.6 (601)  | 360            | 52.5 (189)  | 394       | 53.3 (210)  | 389       | 51.9 (202)  | 571    | 53.2 (304)  | 572  | 51.9 (297)  |
| WSH                          | 1043             | 50.3 (525)  | 366            | 49.7 (182)  | 345       | 53.9 (186)  | 332       | 47.3 (157)  | 568    | 49.5 (281)  | 475  | 51.4 (244)  |
| N                            | 1048             | 50.4 (528)  | 347            | 49.3 (171)  | 358       | 54.8 (196)  | 343       | 46.9 (161)  | 495    | 51.1 (253)  | 553  | 49.7 (275)  |
| N+WSH                        | 1046             | 53.1 (555)  | 365            | 51.8 (189)  | 352       | 55.7 (196)  | 329       | 51.7 (170)  | 574    | 52.8 (303)  | 472  | 53.4 (252)  |
| Used antibiotics ≥2 times    |                  |             |                |             |           |             |           |             |        |             |      |             |
| C                            | 1143             | 13.3 (152)  | 360            | 17.2 (62)   | 394       | 11.7 (46)   | 389       | 11.3 (44)   | 571    | 12.8 (73)   | 572  | 13.8 (79)   |
| WSH                          | 1043             | 13.7 (143)  | 366            | 14.2 (52)   | 345       | 13.9 (48)   | 332       | 13.0 (43)   | 568    | 12.7 (72)   | 475  | 15.0 (71)   |
| N                            | 1048             | 11.6 (122)  | 347            | 14.7 (51)   | 358       | 12.0 (43)   | 343       | 8.2 (28)    | 495    | 12.7 (63)   | 553  | 10.7 (59)   |
| N+WSH                        | 1046             | 13.0 (136)  | 365            | 14.8 (54)   | 352       | 13.6 (48)   | 329       | 10.3 (34)   | 574    | 12.4 (71)   | 472  | 13.8 (65)   |
| Arm                          | N                | Mean (SD)   | N              | Mean (SD)   | N         | Mean (SD)   | N         | Mean (SD)   | N      | Mean (SD)   | N    | Mean (SD)   |
| Episodes of antibiotic use   |                  |             |                |             |           |             |           |             |        |             |      |             |
| C                            | 1143             | 0.68 (0.75) | 360            | 0.74 (0.85) | 394       | 0.65 (0.69) | 389       | 0.64 (0.69) | 571    | 0.67 (0.72) | 572  | 0.68 (0.77) |
| WSH                          | 1043             | 0.66 (0.77) | 366            | 0.68 (0.83) | 345       | 0.69 (0.74) | 332       | 0.61 (0.74) | 568    | 0.64 (0.76) | 475  | 0.69 (0.78) |
| N                            | 1048             | 0.65 (0.78) | 347            | 0.70 (0.93) | 358       | 0.68 (0.72) | 343       | 0.55 (0.65) | 495    | 0.66 (0.77) | 553  | 0.63 (0.79) |
| N+WSH                        | 1046             | 0.69 (0.78) | 365            | 0.71 (0.85) | 352       | 0.72 (0.78) | 329       | 0.63 (0.70) | 574    | 0.68 (0.77) | 472  | 0.71 (0.80) |
| Total days of antibiotic use |                  |             |                |             |           |             |           |             |        |             |      |             |
| C                            | 1142             | 3.95 (12.1) | 359            | 5.61 (18.8) | 394       | 3.42 (9.11) | 389       | 2.95 (3.90) | 571    | 4.10 (12.7) | 571  | 3.80 (11.5) |
| WSH                          | 1043             | 4.14 (13.0) | 366            | 4.06 (10.9) | 345       | 5.37 (19.2) | 332       | 2.95 (4.12) | 568    | 4.53 (15.7) | 475  | 3.68 (8.72) |
| N                            | 1047             | 3.36 (8.45) | 347            | 2.90 (4.69) | 357       | 4.15 (12.0) | 343       | 2.99 (6.67) | 494    | 3.59 (9.60) | 553  | 3.15 (7.27) |
| N+WSH                        | 1046             | 3.71 (9.02) | 365            | 3.93 (9.96) | 352       | 3.56 (9.51) | 329       | 3.61 (7.22) | 574    | 3.60 (8.28) | 472  | 3.84 (9.86) |

C: Control; WSH: Water, sanitation, hygiene; N: Nutrition, N+WSH: Nutrition+ water, sanitation, hygiene; SD: Standard deviation.

**Table S8.** WSH, nutrition and N+WSH interventions vs. controls on antibiotic use within last 3 months among children in Bangladesh

|                              |      |             | Relative effects  |         |                   |         | Absolute effects     |         |                      |         |
|------------------------------|------|-------------|-------------------|---------|-------------------|---------|----------------------|---------|----------------------|---------|
|                              |      |             | Unadjusted        |         | Adjusted          |         | Unadjusted           |         | Adjusted             |         |
| Arm                          | n    | % (n)       | PR (95% CI)       | p-value | PR (95% CI)       | p-value | PD (95% CI)          | p-value | PD (95% CI)          | p-value |
| Used antibiotics ≥1 time     |      |             |                   |         |                   |         |                      |         |                      |         |
| C                            | 1005 | 63.2 (635)  | ref               | --      | --                | --      | --                   | --      | --                   | --      |
| WSH                          | 1077 | 57.0 (614)  | 0.90 (0.82, 0.99) | 0.03    | 0.90 (0.82, 0.99) | 0.03    | -0.06 (-0.12, -0.01) | 0.03    | -0.07 (-0.12, 0.03)  | 0.03    |
| N                            | 1018 | 54.1 (551)  | 0.86 (0.78, 0.94) | <0.001  | 0.84 (0.76, 0.92) | <0.001  | -0.09 (-0.14, -0.04) | <0.001  | -0.10 (-0.16, -0.05) | <0.001  |
| N+WSH                        | 1058 | 54.2 (573)  | 0.86 (0.79, 0.93) | <0.001  | 0.86 (0.78, 0.93) | <0.001  | -0.09 (-0.14, -0.04) | <0.001  | -0.10 (-0.15, -0.04) | <0.001  |
| Used antibiotics ≥2 times    |      |             |                   |         |                   |         |                      |         |                      |         |
| C                            | 1005 | 24.7 (248)  | ref               | --      | --                | --      | --                   | --      | --                   | --      |
| WSH                          | 1077 | 18.2 (196)  | 0.74 (0.63, 0.87) | <0.001  | 0.73 (0.63, 0.85) | <0.001  | -0.06 (-0.10, -0.03) | <0.001  | -0.07 (-0.10, -0.04) | <0.001  |
| N                            | 1018 | 16.4 (167)  | 0.66 (0.56, 0.79) | <0.001  | 0.64 (0.53, 0.78) | <0.001  | -0.08 (-0.12, -0.05) | <0.001  | -0.09 (-0.13, -0.05) | <0.001  |
| N+WSH                        | 1058 | 16.2 (171)  | 0.65 (0.55, 0.78) | <0.001  | 0.66 (0.55, 0.79) | <0.001  | -0.09 (-0.12, -0.05) | <0.001  | -0.08 (-0.12, -0.05) | <0.001  |
| Arm                          | N    | Mean (SD)   | CR (95% CI)       | p-value | CR (95% CI)       | p-value | CD (95% CI)          | p-value | CD (95% CI)          | p-value |
| Episodes of antibiotic use   |      |             |                   |         |                   |         |                      |         |                      |         |
| C                            | 1005 | 0.98 (0.98) | ref               | --      | --                | --      | --                   | --      | --                   | --      |
| WSH                          | 1077 | 0.81 (0.88) | 0.83 (0.75, 0.92) | <0.001  | 0.82 (0.74, 0.90) | <0.001  | -0.17 (-0.26, -0.07) | <0.001  | -0.18 (-0.27, -0.09) | <0.001  |
| N                            | 1018 | 0.77 (0.90) | 0.79 (0.72, 0.88) | <0.001  | 0.77 (0.69, 0.86) | <0.001  | -0.20 (-0.29, -0.11) | <0.001  | -0.22 (-0.32, -0.13) | <0.001  |
| N+WSH                        | 1058 | 0.77 (0.89) | 0.79 (0.71, 0.87) | <0.001  | 0.78 (0.71, 0.87) | <0.001  | -0.21 (-0.29, -0.12) | <0.001  | -0.21 (-0.30, -0.12) | <0.001  |
| Total days of antibiotic use |      |             |                   |         |                   |         |                      |         |                      |         |
| C                            | 995  | 5.06 (5.81) | ref               | --      | --                | --      | --                   | --      | --                   | --      |
| WSH                          | 1075 | 4.11 (5.05) | 0.81 (0.74, 0.90) | <0.001  | 0.81 (0.73, 0.89) | <0.001  | -0.94 (-1.41, -0.48) | <0.001  | -1.02 (-1.49, -0.54) | <0.001  |
| N                            | 1016 | 4.02 (5.30) | 0.79 (0.71, 0.89) | <0.001  | 0.75 (0.67, 0.85) | <0.001  | -1.05 (-1.54, -0.55) | <0.001  | -1.19 (-1.74, -0.65) | <0.001  |
| N+WSH                        | 1055 | 4.05 (5.39) | 0.80 (0.72, 0.89) | <0.001  | 0.80 (0.71, 0.89) | <0.001  | -1.01 (-1.51, -0.51) | <0.001  | -1.06 (-1.60, -0.53) | <0.001  |

PR: Prevalence ratio (for binary outcomes), CR: Count ratio (for count outcomes); PD: Prevalence difference (for binary outcomes); CD: Count difference (for count outcomes); CI: Confidence interval; C: Control; WSH: Water, sanitation, hygiene; N: Nutrition, N+WSH: Nutrition+ water, sanitation, hygiene.

**Table S9.** Combined N+WSH intervention vs. WSH and nutrition interventions on antibiotic use within last 3 months among children in Bangladesh

| Arm                                 | Relative effects  |         |                   |         | Absolute effects    |         |                     |         |
|-------------------------------------|-------------------|---------|-------------------|---------|---------------------|---------|---------------------|---------|
|                                     | Unadjusted        |         | Adjusted          |         | Unadjusted          |         | Adjusted            |         |
|                                     | PR (95% CI)       | p-value | PR (95% CI)       | p-value | PD (95% CI)         | p-value | PD (95% CI)         | p-value |
| <b>Used antibiotics ≥1 time</b>     |                   |         |                   |         |                     |         |                     |         |
| N+WSH vs. WSH                       | 0.95 (0.87, 1.03) | 0.22    | 0.95 (0.88, 1.04) | 0.26    | -0.03 (-0.07, 0.02) | 0.22    | -0.02 (-0.07, 0.02) | 0.35    |
| N+WSH vs. N                         | 1.00 (0.91, 1.10) | 0.99    | 1.01 (0.92, 1.12) | 0.77    | 0.00 (-0.05, 0.05)  | 0.99    | 0.01 (-0.05, 0.06)  | 0.77    |
| <b>Used antibiotics ≥2 times</b>    |                   |         |                   |         |                     |         |                     |         |
| N+WSH vs. WSH                       | 0.89 (0.74, 1.06) | 0.19    | 0.91 (0.76, 1.09) | 0.32    | -0.02 (-0.05, 0.01) | 0.19    | -0.01 (-0.04, 0.01) | 0.40    |
| N+WSH vs. N                         | 0.99 (0.83, 1.17) | 0.87    | 1.05 (0.88, 1.25) | 0.62    | -0.00 (-0.03, 0.03) | 0.87    | 0.01 (-0.02, 0.04)  | 0.59    |
| <b>Episodes of antibiotic use</b>   |                   |         |                   |         |                     |         |                     |         |
| N+WSH vs. WSH                       | 0.95 (0.85, 1.06) | 0.35    | 0.98 (0.88, 1.09) | 0.68    | -0.04 (-0.13, 0.04) | 0.35    | -0.02 (-0.10, 0.07) | 0.67    |
| N+WSH vs. N                         | 0.99 (0.89, 1.10) | 0.87    | 1.02 (0.91, 1.14) | 0.76    | -0.01 (-0.09, 0.08) | 0.87    | 0.01 (-0.07, 0.10)  | 0.75    |
| <b>Total days of antibiotic use</b> |                   |         |                   |         |                     |         |                     |         |
| N+WSH vs. WSH                       | 0.98 (0.87, 1.11) | 0.79    | 0.99 (0.87, 1.11) | 0.83    | -0.07 (-0.55, 0.41) | 0.79    | 0.04 (-0.45, 0.53)  | 0.87    |
| N+WSH vs. N                         | 1.01 (0.90, 1.13) | 0.88    | 1.05 (0.93, 1.18) | 0.41    | 0.03 (-0.42, 0.49)  | 0.88    | 0.17 (-0.30, 0.63)  | 0.48    |

PR: Prevalence ratio (for binary outcomes), CR: Count ratio (for count outcomes); PD: Prevalence difference (for binary outcomes); CD: Count difference (for count outcomes); CI: Confidence interval; WSH: Water, sanitation, hygiene; N: Nutrition, N+WSH: Nutrition+ water, sanitation, hygiene.

**Table S10.** WSH, nutrition and N+WSH interventions vs. controls on antibiotic use within last 3 months among children in Kenya

|                                     |      |             | Relative effects  |         |                   |         | Absolute effects    |         |                     |         |
|-------------------------------------|------|-------------|-------------------|---------|-------------------|---------|---------------------|---------|---------------------|---------|
|                                     |      |             | Unadjusted        |         | Adjusted          |         | Unadjusted          |         | Adjusted            |         |
| Arm                                 | N    | % (n)       | PR (95% CI)       | p-value | PR (95% CI)       | p-value | PD (95% CI)         | p-value | PD (95% CI)         | p-value |
| <b>Used antibiotics ≥1 time</b>     |      |             |                   |         |                   |         |                     |         |                     |         |
| C                                   | 1143 | 52.6 (601)  | ref               | --      | --                | --      | --                  | --      | --                  | --      |
| WSH                                 | 1043 | 50.3 (525)  | 0.96 (0.86, 1.06) | 0.41    | 0.97 (0.88, 1.07) | 0.55    | -0.02 (-0.08, 0.03) | 0.41    | -0.02 (-0.07, 0.04) | 0.53    |
| N                                   | 1048 | 50.4 (528)  | 0.96 (0.88, 1.04) | 0.33    | 0.95 (0.87, 1.03) | 0.19    | -0.02 (-0.07, 0.02) | 0.33    | -0.03 (-0.07, 0.02) | 0.22    |
| N+WSH                               | 1046 | 53.1 (555)  | 1.01 (0.92, 1.10) | 0.84    | 1.00 (0.91, 1.09) | 0.99    | 0.00 (-0.04, 0.05)  | 0.84    | 0.00 (-0.05, 0.05)  | 0.97    |
| <b>Used antibiotics ≥2 times</b>    |      |             |                   |         |                   |         |                     |         |                     |         |
| C                                   | 1143 | 13.3 (152)  | ref               | --      | --                | --      | --                  | --      | --                  | --      |
| WSH                                 | 1043 | 13.7 (143)  | 1.03 (0.80, 1.32) | 0.81    | 1.03 (0.79, 1.35) | 0.81    | 0.00 (-0.03, 0.04)  | 0.81    | 0.00 (-0.03, 0.04)  | 0.80    |
| N                                   | 1048 | 11.6 (122)  | 0.88 (0.68, 1.12) | 0.30    | 0.88 (0.68, 1.14) | 0.33    | -0.02 (-0.05, 0.01) | 0.30    | -0.02 (-0.05, 0.02) | 0.33    |
| N+WSH                               | 1046 | 13.0 (136)  | 0.98 (0.78, 1.22) | 0.84    | 0.94 (0.74, 1.19) | 0.61    | -0.00 (-0.03, 0.03) | 0.84    | -0.01 (-0.04, 0.02) | 0.61    |
| Arm                                 | N    | Mean (SD)   | CR (95% CI)       | p-value | CR (95% CI)       | p-value | CD (95% CI)         | p-value | CD (95% CI)         | p-value |
| <b>Episodes of antibiotic use</b>   |      |             |                   |         |                   |         |                     |         |                     |         |
| C                                   | 1143 | 0.68 (0.75) | ref               | --      | --                | --      | --                  | --      | --                  | --      |
| WSH                                 | 1043 | 0.66 (0.77) | 0.98 (0.87, 1.10) | 0.77    | 0.99 (0.89, 1.12) | 0.92    | -0.01 (-0.09, 0.07) | 0.77    | -0.00 (-0.08, 0.07) | 0.93    |
| N                                   | 1048 | 0.65 (0.78) | 0.96 (0.85, 1.07) | 0.45    | 0.96 (0.86, 1.07) | 0.41    | -0.03 (-0.10, 0.05) | 0.44    | -0.03 (-0.10, 0.04) | 0.40    |
| N+WSH                               | 1046 | 0.69 (0.78) | 1.02 (0.92, 1.14) | 0.66    | 1.00 (0.90, 1.12) | 0.90    | 0.02 (-0.06, 0.09)  | 0.67    | 0.00 (-0.07, 0.08)  | 0.90    |
| <b>Total days of antibiotic use</b> |      |             |                   |         |                   |         |                     |         |                     |         |
| C                                   | 1142 | 3.95 (12.1) | ref               | --      | --                | --      | --                  | --      | --                  | --      |
| WSH                                 | 1043 | 4.14 (13.0) | 1.05 (0.71, 1.54) | 0.81    | 1.00 (0.73, 1.37) | 0.99    | 0.19 (-1.37, 1.76)  | 0.81    | 0.25 (-1.37, 1.88)  | 0.76    |
| N                                   | 1047 | 3.36 (8.45) | 0.85 (0.65, 1.12) | 0.24    | 0.83 (0.63, 1.09) | 0.17    | -0.59 (-1.61, 0.43) | 0.25    | -0.68 (-1.68, 0.32) | 0.18    |
| N+WSH                               | 1046 | 3.71 (9.02) | 0.94 (0.76, 1.17) | 0.57    | 0.95 (0.77, 1.16) | 0.60    | -0.24 (-1.08, 0.60) | 0.58    | -0.29 (-1.16, 0.58) | 0.51    |

PR: Prevalence ratio (for binary outcomes), CR: Count ratio (for count outcomes); PD: Prevalence difference (for binary outcomes); CD: Count difference (for count outcomes); CI: Confidence interval; C: Control; WSH: Water, sanitation, hygiene; N: Nutrition, N+WSH: Nutrition+ water, sanitation, hygiene.

**Table S11.** N+WSH intervention vs. WSH and nutrition interventions on antibiotic use within last 3 months among children in Kenya

| Arm                                 | Relative effects  |         |                   |         | Absolute effects    |         |                     |         |
|-------------------------------------|-------------------|---------|-------------------|---------|---------------------|---------|---------------------|---------|
|                                     | Unadjusted        |         | Adjusted          |         | Unadjusted          |         | Adjusted            |         |
|                                     | PR (95% CI)       | p-value | PR (95% CI)       | p-value | PD (95% CI)         | p-value | PD (95% CI)         | p-value |
| <b>Used antibiotics ≥1 time</b>     |                   |         |                   |         |                     |         |                     |         |
| N+WSH vs. WSH                       | 1.05 (0.95, 1.17) | 0.33    | 1.04 (0.93, 1.15) | 0.50    | 0.03 (-0.03, 0.08)  | 0.33    | 0.02 (-0.04, 0.07)  | 0.54    |
| N+WSH vs. N                         | 1.05 (0.95, 1.17) | 0.32    | 1.05 (0.95, 1.16) | 0.36    | 0.03 (-0.03, 0.08)  | 0.32    | 0.03 (-0.03, 0.08)  | 0.35    |
| <b>Used antibiotics ≥2 times</b>    |                   |         |                   |         |                     |         |                     |         |
| N+WSH vs. WSH                       | 0.95 (0.71, 1.27) | 0.72    | 0.95 (0.70, 1.28) | 0.72    | -0.01 (-0.05, 0.03) | 0.73    | -0.01 (-0.05, 0.03) | 0.73    |
| N+WSH vs. N                         | 1.12 (0.82, 1.52) | 0.48    | 1.12 (0.81, 1.54) | 0.49    | 0.01 (-0.02, 0.05)  | 0.49    | 0.01 (-0.03, 0.05)  | 0.51    |
| <b>Episodes of antibiotic use</b>   |                   |         |                   |         |                     |         |                     |         |
| N+WSH vs. WSH                       | 1.04 (0.91, 1.19) | 0.56    | 1.02 (0.89, 1.17) | 0.72    | 0.03 (-0.06, 0.12)  | 0.56    | 0.02 (-0.08, 0.11)  | 0.73    |
| N+WSH vs. N                         | 1.07 (0.93, 1.23) | 0.34    | 1.08 (0.93, 1.24) | 0.31    | 0.05 (-0.05, 0.14)  | 0.34    | 0.05 (-0.05, 0.14)  | 0.33    |
| <b>Total days of antibiotic use</b> |                   |         |                   |         |                     |         |                     |         |
| N+WSH vs. WSH                       | 0.90 (0.64, 1.26) | 0.52    | 0.95 (0.72, 1.25) | 0.70    | -0.43 (-1.81, 0.94) | 0.53    | -0.48 (-1.86, 0.89) | 0.49    |
| N+WSH vs. N                         | 1.10 (0.87, 1.40) | 0.41    | 1.19 (0.95, 1.49) | 0.13    | 0.35 (-0.48, 1.18)  | 0.41    | 0.50 (-0.33, 1.33)  | 0.24    |

PR: Prevalence ratio (for binary outcomes), CR: Count ratio (for count outcomes); PD: Prevalence difference (for binary outcomes); CD: Count difference (for count outcomes); CI: Confidence interval; WSH: Water, sanitation, hygiene; N: Nutrition, N+WSH: Nutrition+ water, sanitation, hygiene.

**Table S12.** Multiplicative interaction by age and sex for unadjusted intervention effects on antibiotic use within last 3 months, Bangladesh

|                              | WSH vs. C                |                      | N vs. C                  |                      | N+WSH vs. C              |                      | N+WSH vs. WSH            |                      | N+WSH vs. N       |                      |
|------------------------------|--------------------------|----------------------|--------------------------|----------------------|--------------------------|----------------------|--------------------------|----------------------|-------------------|----------------------|
|                              | PR (95% CI)              | p-value <sup>a</sup> | PR (95% CI)              | p-value <sup>a</sup> | PR (95% CI)              | p-value <sup>a</sup> | PR (95% CI)              | p-value <sup>a</sup> | PR (95% CI)       | p-value <sup>a</sup> |
| Used antibiotics ≥1 time     |                          |                      |                          |                      |                          |                      |                          |                      |                   |                      |
| All obs                      | <b>0.90 (0.82, 0.99)</b> |                      | <b>0.86 (0.78, 0.94)</b> |                      | <b>0.86 (0.79, 0.93)</b> |                      | 0.95 (0.87, 1.03)        |                      | 1.00 (0.91, 1.10) |                      |
| Age 3 mo                     | 0.84 (0.70, 1.02)        | --                   | <b>0.76 (0.63, 0.93)</b> | --                   | <b>0.67 (0.54, 0.82)</b> | --                   | <b>0.79 (0.62, 1.00)</b> | --                   | 0.87 (0.67, 1.13) | --                   |
| Age 14 mo                    | 0.94 (0.85, 1.04)        | 0.26                 | 0.91 (0.82, 1.00)        | 0.10 *               | 0.95 (0.86, 1.05)        | <0.001 *             | 1.01 (0.92, 1.11)        | 0.06 *               | 1.05 (0.94, 1.17) | 0.15 *               |
| Age 28 mo                    | 0.90 (0.78, 1.03)        | 0.57                 | <b>0.85 (0.73, 1.00)</b> | 0.39                 | 0.88 (0.76, 1.00)        | 0.04 *               | 0.98 (0.87, 1.10)        | 0.09 *               | 1.02 (0.89, 1.18) | 0.30                 |
| Female                       | <b>0.88 (0.77, 1.00)</b> | --                   | <b>0.80 (0.70, 0.90)</b> | --                   | <b>0.80 (0.71, 0.90)</b> | --                   | 0.91 (0.80, 1.03)        | --                   | 1.00 (0.87, 1.15) | --                   |
| Male                         | 0.92 (0.83, 1.03)        | 0.49                 | 0.91 (0.81, 1.02)        | 0.09 *               | 0.92 (0.83, 1.03)        | 0.05 *               | 1.00 (0.90, 1.11)        | 0.24                 | 1.01 (0.91, 1.13) | 0.88                 |
| Used antibiotics ≥2 times    |                          |                      |                          |                      |                          |                      |                          |                      |                   |                      |
| All obs                      | <b>0.74 (0.63, 0.87)</b> |                      | <b>0.66 (0.56, 0.79)</b> |                      | <b>0.65 (0.55, 0.78)</b> |                      | 0.89 (0.74, 1.06)        |                      | 0.99 (0.83, 1.17) |                      |
| Age 3 mo                     | <b>0.57 (0.37, 0.86)</b> | --                   | <b>0.51 (0.33, 0.78)</b> | --                   | <b>0.48 (0.33, 0.69)</b> | --                   | 0.85 (0.54, 1.32)        | --                   | 0.94 (0.61, 1.44) | --                   |
| Age 14 mo                    | <b>0.74 (0.60, 0.90)</b> | 0.26                 | <b>0.70 (0.57, 0.86)</b> | 0.18 *               | <b>0.77 (0.64, 0.94)</b> | 0.02 *               | 1.05 (0.84, 1.31)        | 0.40                 | 1.10 (0.90, 1.36) | 0.52                 |
| Age 28 mo                    | 0.99 (0.75, 1.32)        | 0.04 *               | 0.79 (0.55, 1.13)        | 0.12 *               | <b>0.64 (0.42, 0.98)</b> | 0.29                 | <b>0.65 (0.45, 0.93)</b> | 0.38                 | 0.81 (0.53, 1.26) | 0.64                 |
| Female                       | <b>0.72 (0.55, 0.93)</b> | --                   | <b>0.71 (0.56, 0.90)</b> | --                   | <b>0.66 (0.52, 0.83)</b> | --                   | 0.91 (0.69, 1.20)        | --                   | 0.93 (0.70, 1.22) | --                   |
| Male                         | <b>0.74 (0.60, 0.91)</b> | 0.85                 | <b>0.63 (0.50, 0.79)</b> | 0.47                 | <b>0.66 (0.51, 0.85)</b> | 0.97                 | 0.89 (0.70, 1.13)        | 0.89                 | 1.06 (0.81, 1.37) | 0.54                 |
|                              | CR (95% CI)              | p-value <sup>a</sup> | CR (95% CI)              | p-value <sup>a</sup> | CR (95% CI)              | p-value <sup>a</sup> | CR (95% CI)              | p-value <sup>a</sup> | CR (95% CI)       | p-value <sup>a</sup> |
| Episodes of antibiotic use   |                          |                      |                          |                      |                          |                      |                          |                      |                   |                      |
| All obs                      | <b>0.83 (0.75, 0.92)</b> |                      | <b>0.79 (0.72, 0.88)</b> |                      | <b>0.79 (0.71, 0.87)</b> |                      | 0.95 (0.85, 1.06)        |                      | 0.99 (0.89, 1.10) |                      |
| Age 3 mo                     | <b>0.72 (0.57, 0.92)</b> | --                   | <b>0.65 (0.50, 0.84)</b> | --                   | <b>0.62 (0.49, 0.80)</b> | --                   | 0.86 (0.67, 1.11)        | --                   | 0.96 (0.74, 1.25) | --                   |
| Age 14 mo                    | <b>0.85 (0.75, 0.96)</b> | 0.19 *               | <b>0.85 (0.75, 0.96)</b> | 0.05 *               | <b>0.88 (0.79, 0.99)</b> | 0.01 *               | 1.03 (0.90, 1.18)        | 0.18 *               | 1.04 (0.91, 1.19) | 0.59                 |
| Age 28 mo                    | 0.89 (0.77, 1.03)        | 0.14 *               | <b>0.84 (0.71, 1.00)</b> | 0.11 *               | <b>0.80 (0.68, 0.94)</b> | 0.10 *               | 0.90 (0.78, 1.04)        | 0.75                 | 0.95 (0.81, 1.13) | 0.97                 |
| Female                       | <b>0.80 (0.69, 0.93)</b> | --                   | <b>0.76 (0.66, 0.88)</b> | --                   | <b>0.76 (0.67, 0.86)</b> | --                   | 0.94 (0.81, 1.09)        | --                   | 1.00 (0.86, 1.16) | --                   |
| Male                         | <b>0.84 (0.73, 0.97)</b> | 0.65                 | <b>0.82 (0.71, 0.94)</b> | 0.48                 | <b>0.82 (0.71, 0.95)</b> | 0.43                 | 0.97 (0.84, 1.13)        | 0.75                 | 1.00 (0.87, 1.16) | 0.94                 |
| Total days of antibiotic use |                          |                      |                          |                      |                          |                      |                          |                      |                   |                      |
| All obs                      | <b>0.81 (0.74, 0.90)</b> |                      | <b>0.79 (0.71, 0.89)</b> |                      | <b>0.80 (0.72, 0.89)</b> |                      | 0.98 (0.87, 1.11)        |                      | 1.01 (0.90, 1.13) |                      |
| Age 3 mo                     | <b>0.74 (0.58, 0.94)</b> | --                   | <b>0.63 (0.48, 0.83)</b> | --                   | <b>0.68 (0.52, 0.89)</b> | --                   | 0.92 (0.69, 1.22)        | --                   | 1.08 (0.81, 1.46) | --                   |
| Age 14 mo                    | <b>0.82 (0.72, 0.93)</b> | 0.44                 | <b>0.85 (0.75, 0.97)</b> | 0.05 *               | 0.91 (0.79, 1.05)        | 0.04 *               | 1.11 (0.96, 1.29)        | 0.19 *               | 1.07 (0.93, 1.23) | 0.93                 |
| Age 28 mo                    | 0.88 (0.74, 1.05)        | 0.30                 | 0.85 (0.70, 1.03)        | 0.09 *               | <b>0.76 (0.64, 0.90)</b> | 0.54 *               | 0.86 (0.73, 1.01)        | 0.70                 | 0.89 (0.74, 1.07) | 0.29                 |
| Female                       | <b>0.80 (0.67, 0.95)</b> | --                   | <b>0.77 (0.64, 0.92)</b> | --                   | <b>0.76 (0.66, 0.89)</b> | --                   | 0.95 (0.82, 1.12)        | --                   | 0.99 (0.84, 1.18) | --                   |
| Male                         | <b>0.82 (0.72, 0.93)</b> | 0.87                 | <b>0.81 (0.70, 0.94)</b> | 0.68                 | <b>0.84 (0.72, 0.98)</b> | 0.36                 | 1.03 (0.87, 1.22)        | 0.52                 | 1.04 (0.88, 1.23) | 0.72                 |

PR: Prevalence ratio (for binary outcomes), CR: Count ratio (for count outcomes); CI: Confidence interval; C: Control; WSH: Water, sanitation, hygiene; N: Nutrition, N+WSH: Nutrition+ water, sanitation, hygiene.

Bolded values refer to estimates with a p-value ≤0.05.

<sup>a</sup> p-value for interaction term between study arm and subgroup variable.

\* Interaction p-values <0.20 indicate significant effect modification.

**Table S13.** Additive interaction by age and sex for unadjusted intervention effects on antibiotic use within last 3 months, Bangladesh

|                              | WSH vs. C                   |                      | N vs. C                     |                      | N+WSH vs. C                 |                      | N+WSH vs. WSH               |                      | N+WSH vs. N         |                      |
|------------------------------|-----------------------------|----------------------|-----------------------------|----------------------|-----------------------------|----------------------|-----------------------------|----------------------|---------------------|----------------------|
|                              | PD (95% CI)                 | p-value <sup>a</sup> | PD (95% CI)                 | p-value <sup>a</sup> | PD (95% CI)                 | p-value <sup>a</sup> | PD (95% CI)                 | p-value <sup>a</sup> | PD (95% CI)         | p-value <sup>a</sup> |
| Used antibiotics ≥1 time     |                             |                      |                             |                      |                             |                      |                             |                      |                     |                      |
| All obs                      | <b>-0.06 (-0.12, -0.01)</b> |                      | <b>-0.09 (-0.14, -0.04)</b> |                      | <b>-0.09 (-0.14, -0.04)</b> |                      | -0.03 (-0.07, 0.02)         |                      | 0.00 (-0.05, 0.05)  |                      |
| Age 3 mo                     | -0.08 (-0.17, 0.01)         | --                   | <b>-0.13 (-0.22, -0.04)</b> | --                   | <b>-0.18 (-0.27, -0.09)</b> | --                   | <b>-0.10 (-0.19, 0.00)</b>  | --                   | -0.05 (-0.15, 0.05) | --                   |
| Age 14 mo                    | -0.04 (-0.12, 0.03)         | 0.43                 | -0.07 (-0.14, 0.00)         | 0.28                 | -0.04 (-0.11, 0.04)         | 0.01 *               | 0.01 (-0.06, 0.08)          | 0.09 *               | 0.03 (-0.04, 0.11)  | 0.12 *               |
| Age 28 mo                    | -0.06 (-0.14, 0.02)         | 0.64                 | <b>-0.08 (-0.16, -0.00)</b> | 0.49                 | -0.07 (-0.15, 0.00)         | 0.08 *               | -0.01 (-0.07, 0.04)         | 0.12 *               | 0.01 (-0.06, 0.08)  | 0.32                 |
| Female                       | <b>-0.08 (-0.15, -0.00)</b> | --                   | <b>-0.13 (-0.19, -0.07)</b> | --                   | <b>-0.13 (-0.19, -0.06)</b> | --                   | -0.05 (-0.12, 0.02)         | --                   | 0.00 (-0.07, 0.07)  | --                   |
| Male                         | -0.05 (-0.12, 0.02)         | 0.54                 | -0.06 (-0.13, 0.01)         | 0.12 *               | -0.05 (-0.12, 0.02)         | 0.06 *               | 0.00 (-0.06, 0.06)          | 0.27                 | 0.01 (-0.06, 0.07)  | 0.87                 |
| Used antibiotics ≥2 times    |                             |                      |                             |                      |                             |                      |                             |                      |                     |                      |
| All obs                      | <b>-0.06 (-0.10, -0.03)</b> |                      | <b>-0.08 (-0.12, -0.05)</b> |                      | <b>-0.09 (-0.12, -0.05)</b> |                      | -0.02 (-0.05, 0.01)         |                      | 0.00 (-0.03, 0.03)  |                      |
| Age 3 mo                     | <b>-0.11 (-0.18, -0.03)</b> | --                   | <b>-0.12 (-0.19, -0.05)</b> | --                   | <b>-0.13 (-0.19, -0.06)</b> | --                   | -0.02 (-0.08, 0.04)         | --                   | -0.01 (-0.06, 0.05) | --                   |
| Age 14 mo                    | <b>-0.09 (-0.15, -0.03)</b> | 0.73                 | <b>-0.10 (-0.16, -0.05)</b> | 0.68                 | <b>-0.08 (-0.13, -0.02)</b> | 0.22                 | 0.01 (-0.04, 0.07)          | 0.42                 | 0.03 (-0.03, 0.08)  | 0.41                 |
| Age 28 mo                    | -0.00 (-0.04, 0.04)         | 0.02 *               | -0.03 (-0.07, 0.01)         | 0.03 *               | <b>-0.05 (-0.10, -0.00)</b> | 0.04 *               | <b>-0.05 (-0.09, -0.01)</b> | 0.47                 | -0.02 (-0.06, 0.02) | 0.71                 |
| Female                       | <b>-0.06 (-0.11, -0.01)</b> | --                   | <b>-0.06 (-0.11, -0.02)</b> | --                   | <b>-0.08 (-0.12, -0.03)</b> | --                   | -0.01 (-0.06, 0.03)         | --                   | -0.01 (-0.05, 0.03) | --                   |
| Male                         | <b>-0.07 (-0.12, -0.02)</b> | 0.82                 | <b>-0.10 (-0.15, -0.05)</b> | 0.26                 | <b>-0.09 (-0.15, -0.04)</b> | 0.64                 | -0.02 (-0.07, 0.02)         | 0.78                 | 0.01 (-0.04, 0.06)  | 0.55                 |
|                              | CD (95% CI)                 | p-value <sup>a</sup> | CD (95% CI)                 | p-value <sup>a</sup> | CD (95% CI)                 | p-value <sup>a</sup> | CD (95% CI)                 | p-value <sup>a</sup> | CD (95% CI)         | p-value <sup>a</sup> |
| Episodes of antibiotic use   |                             |                      |                             |                      |                             |                      |                             |                      |                     |                      |
| All obs                      | -0.17 (-0.26, -0.07)        | <0.001               | -0.20 (-0.29, -0.11)        | <0.001               | -0.21 (-0.29, -0.12)        | <0.001               | -0.04 (-0.13, 0.04)         | 0.35                 | -0.01 (-0.09, 0.08) | 0.87                 |
| Age 3 mo                     | <b>-0.25 (-0.43, -0.07)</b> | --                   | <b>-0.32 (-0.50, -0.14)</b> | --                   | <b>-0.34 (-0.51, -0.17)</b> | --                   | -0.06 (-0.13, 0.02)         | --                   | -0.02 (-0.10, 0.05) | --                   |
| Age 14 mo                    | <b>-0.18 (-0.32, -0.04)</b> | 0.52                 | <b>-0.19 (-0.32, -0.05)</b> | 0.23                 | <b>-0.15 (-0.28, -0.02)</b> | 0.05 *               | -0.03 (-0.10, 0.04)         | 0.64                 | 0.02 (-0.05, 0.09)  | 0.37                 |
| Age 28 mo                    | -0.08 (-0.19, 0.03)         | 0.11 *               | <b>-0.12 (-0.24, -0.00)</b> | 0.09 *               | <b>-0.15 (-0.26, -0.04)</b> | 0.08 *               | -0.00 (-0.05, 0.05)         | 0.23                 | -0.02 (-0.07, 0.03) | 0.95                 |
| Female                       | <b>-0.18 (-0.30, -0.06)</b> | --                   | <b>-0.22 (-0.33, -0.11)</b> | --                   | <b>-0.22 (-0.32, -0.12)</b> | --                   | -0.04 (-0.15, 0.06)         | --                   | -0.00 (-0.11, 0.10) | --                   |
| Male                         | <b>-0.16 (-0.29, -0.03)</b> | 0.84                 | <b>-0.19 (-0.32, -0.06)</b> | 0.70                 | <b>-0.18 (-0.32, -0.05)</b> | 0.66                 | -0.02 (-0.15, 0.10)         | 0.81                 | 0.00 (-0.12, 0.13)  | 0.94                 |
| Total days of antibiotic use |                             |                      |                             |                      |                             |                      |                             |                      |                     |                      |
| All obs                      | -0.94 (-1.41, -0.48)        | <0.001               | -1.05 (-1.54, -0.55)        | <0.001               | -1.01 (-1.51, -0.51)        | <0.001               | -0.07 (-0.55, 0.41)         | 0.79                 | 0.03 (-0.42, 0.49)  | 0.88                 |
| Age 3 mo                     | <b>-1.23 (-2.20, -0.26)</b> | --                   | <b>-1.77 (-2.75, -0.79)</b> | --                   | <b>-1.52 (-2.55, -0.49)</b> | --                   | -0.09 (-0.25, 0.06)         | --                   | -0.02 (-0.17, 0.13) | --                   |
| Age 14 mo                    | <b>-1.14 (-1.86, -0.43)</b> | 0.87                 | <b>-0.93 (-1.69, -0.18)</b> | 0.17 *               | -0.57 (-1.41, 0.27)         | 0.12 *               | 0.04 (-0.11, 0.18)          | 0.20                 | 0.04 (-0.11, 0.19)  | 0.52                 |
| Age 28 mo                    | -0.49 (-1.16, 0.18)         | 0.25                 | -0.60 (-1.32, 0.12)         | 0.07 *               | <b>-0.98 (-1.60, -0.36)</b> | 0.41                 | -0.07 (-0.16, 0.02)         | 0.80                 | -0.03 (-0.13, 0.08) | 0.95                 |
| Female                       | <b>-0.95 (-1.72, -0.18)</b> | --                   | <b>-1.10 (-1.85, -0.35)</b> | --                   | <b>-1.12 (-1.75, -0.49)</b> | --                   | -0.17 (-0.76, 0.42)         | --                   | -0.02 (-0.65, 0.60) | --                   |
| Male                         | <b>-0.98 (-1.63, -0.33)</b> | 0.96                 | <b>-1.03 (-1.74, -0.32)</b> | 0.90                 | <b>-0.85 (-1.60, -0.11)</b> | 0.58                 | 0.13 (-0.62, 0.88)          | 0.54                 | 0.17 (-0.55, 0.90)  | 0.70                 |

PD: Prevalence difference (for binary outcomes); CD: Count difference (for count outcomes); CI: Confidence interval; C: Control; WSH: Water, sanitation, hygiene; N: Nutrition, N+WSH: Nutrition+ water, sanitation, hygiene.

Bolded values refer to estimates with a p-value ≤0.05.

<sup>a</sup> p-value for interaction term between study arm and subgroup variable.

\* Interaction p-values <0.20 indicate significant effect modification.

**Table S14.** Multiplicative interaction by age and sex for unadjusted intervention effects on antibiotic use within last 3 months, Kenya

|                              | WSH vs. C         |                      | N vs. C                  |                      | N+WSH vs. C       |                      | N+WSH vs. WSH     |                      | N+WSH vs. N       |                      |
|------------------------------|-------------------|----------------------|--------------------------|----------------------|-------------------|----------------------|-------------------|----------------------|-------------------|----------------------|
|                              | PR (95% CI)       | p-value <sup>a</sup> | PR (95% CI)              | p-value <sup>a</sup> | PR (95% CI)       | p-value <sup>a</sup> | PR (95% CI)       | p-value <sup>a</sup> | PR (95% CI)       | p-value <sup>a</sup> |
| Used antibiotics ≥1 time     |                   |                      |                          |                      |                   |                      |                   |                      |                   |                      |
| All obs                      | 0.96 (0.86, 1.06) | 0.41                 | 0.96 (0.88, 1.04)        | 0.33                 | 1.01 (0.92, 1.10) | 0.84                 | 1.05 (0.95, 1.17) | 0.33                 | 1.05 (0.95, 1.17) | 0.32                 |
| Age 6 mo                     | 0.95 (0.83, 1.08) | --                   | 0.94 (0.82, 1.08)        | --                   | 0.99 (0.84, 1.16) | --                   | 1.04 (0.87, 1.25) | --                   | 1.06 (0.89, 1.24) | --                   |
| Age 17 mo                    | 1.01 (0.85, 1.20) | 0.57                 | 1.03 (0.90, 1.17)        | 0.34                 | 1.04 (0.91, 1.20) | 0.63                 | 1.03 (0.91, 1.18) | 0.93                 | 1.02 (0.88, 1.17) | 0.75                 |
| Age 22 mo                    | 0.91 (0.76, 1.09) | 0.74                 | 0.90 (0.78, 1.04)        | 0.70                 | 1.00 (0.85, 1.16) | 0.94                 | 1.09 (0.92, 1.30) | 0.70                 | 1.10 (0.94, 1.29) | 0.67                 |
| Female                       | 0.93 (0.81, 1.06) | --                   | 0.96 (0.86, 1.07)        | --                   | 0.99 (0.85, 1.15) | --                   | 1.07 (0.93, 1.22) | --                   | 1.03 (0.89, 1.20) | --                   |
| Male                         | 0.99 (0.86, 1.14) | 0.50                 | 0.96 (0.85, 1.08)        | 0.98                 | 1.03 (0.92, 1.15) | 0.72                 | 1.04 (0.89, 1.21) | 0.79                 | 1.07 (0.96, 1.21) | 0.67                 |
| Used antibiotics ≥2 times    |                   |                      |                          |                      |                   |                      |                   |                      |                   |                      |
| All obs                      | 1.03 (0.80, 1.32) | 0.81                 | 0.88 (0.68, 1.12)        | 0.30                 | 0.98 (0.78, 1.22) | 0.84                 | 0.95 (0.71, 1.27) | 0.72                 | 1.12 (0.82, 1.52) | 0.48                 |
| Age 6 mo                     | 0.83 (0.60, 1.14) | --                   | 0.85 (0.59, 1.23)        | --                   | 0.86 (0.59, 1.26) | --                   | 1.04 (0.67, 1.62) | --                   | 1.01 (0.65, 1.56) | --                   |
| Age 17 mo                    | 1.19 (0.77, 1.84) | 0.20                 | 1.03 (0.66, 1.60)        | 0.52                 | 1.17 (0.79, 1.72) | 0.31                 | 0.98 (0.62, 1.55) | 0.85                 | 1.14 (0.76, 1.71) | 0.65                 |
| Age 22 mo                    | 1.15 (0.75, 1.75) | 0.18 *               | 0.72 (0.48, 1.08)        | 0.54                 | 0.91 (0.59, 1.41) | 0.84                 | 0.80 (0.48, 1.32) | 0.39                 | 1.27 (0.80, 1.99) | 0.41                 |
| Female                       | 0.99 (0.74, 1.33) | --                   | 1.00 (0.72, 1.37)        | --                   | 0.97 (0.70, 1.34) | --                   | 0.98 (0.71, 1.35) | --                   | 0.97 (0.66, 1.43) | --                   |
| Male                         | 1.08 (0.75, 1.56) | 0.70                 | 0.77 (0.53, 1.13)        | 0.31                 | 1.00 (0.73, 1.37) | 0.90                 | 0.92 (0.59, 1.44) | 0.83                 | 1.29 (0.85, 1.96) | 0.27                 |
|                              | CR (95% CI)       | p-value <sup>a</sup> | CR (95% CI)              | p-value <sup>a</sup> | CR (95% CI)       | p-value <sup>a</sup> | CR (95% CI)       | p-value <sup>a</sup> | CR (95% CI)       | p-value <sup>a</sup> |
| Episodes of antibiotic use   |                   |                      |                          |                      |                   |                      |                   |                      |                   |                      |
| All obs                      | 0.98 (0.87, 1.10) | 0.77                 | 0.95 (0.85, 1.07)        | 0.45                 | 1.02 (0.92, 1.14) | 0.66                 | 1.04 (0.91, 1.19) | 0.56                 | 1.07 (0.93, 1.23) | 0.34                 |
| Age 6 mo                     | 0.92 (0.79, 1.08) | --                   | 0.94 (0.78, 1.14)        | --                   | 0.96 (0.79, 1.17) | --                   | 1.05 (0.83, 1.32) | --                   | 1.02 (0.82, 1.28) | --                   |
| Age 17 mo                    | 1.06 (0.87, 1.29) | 0.31                 | 1.05 (0.89, 1.22)        | 0.42                 | 1.11 (0.95, 1.29) | 0.31                 | 1.05 (0.87, 1.26) | 0.99                 | 1.06 (0.89, 1.26) | 0.77                 |
| Age 22 mo                    | 0.96 (0.79, 1.18) | 0.72                 | 0.87 (0.75, 1.01)        | 0.45                 | 1.00 (0.84, 1.18) | 0.83                 | 1.03 (0.83, 1.27) | 0.91                 | 1.14 (0.96, 1.36) | 0.37                 |
| Female                       | 0.96 (0.83, 1.11) | --                   | 0.99 (0.86, 1.13)        | --                   | 1.01 (0.86, 1.19) | --                   | 1.05 (0.90, 1.24) | --                   | 1.03 (0.86, 1.23) | --                   |
| Male                         | 1.01 (0.85, 1.19) | 0.63                 | 0.93 (0.79, 1.09)        | 0.53                 | 1.04 (0.91, 1.19) | 0.83                 | 1.03 (0.84, 1.26) | 0.84                 | 1.12 (0.95, 1.32) | 0.42                 |
| Total days of antibiotic use |                   |                      |                          |                      |                   |                      |                   |                      |                   |                      |
| All obs                      | 1.05 (0.71, 1.54) | 0.81                 | 0.85 (0.65, 1.12)        | 0.24                 | 0.94 (0.76, 1.17) | 0.57                 | 0.90 (0.64, 1.27) | 0.52                 | 1.10 (0.87, 1.40) | 0.41                 |
| Age 6 mo                     | 0.72 (0.42, 1.25) | --                   | <b>0.52 (0.35, 0.77)</b> | --                   | 0.70 (0.43, 1.14) | --                   | 0.97 (0.62, 1.51) | --                   | 1.36 (0.97, 1.90) | --                   |
| Age 17 mo                    | 1.57 (0.79, 3.13) | 0.08 *               | 1.21 (0.75, 1.95)        | 0.01 *               | 1.04 (0.74, 1.46) | 0.26                 | 0.66 (0.34, 1.30) | 0.33                 | 0.86 (0.56, 1.33) | 0.12 *               |
| Age 22 mo                    | 1.00 (0.78, 1.28) | 0.27                 | 1.01 (0.75, 1.37)        | 0.01 *               | 1.22 (0.91, 1.65) | 0.06 *               | 1.22 (0.92, 1.63) | 0.42                 | 1.21 (0.87, 1.67) | 0.59                 |
| Female                       | 1.10 (0.67, 1.83) | --                   | 0.88 (0.62, 1.24)        | --                   | 0.88 (0.64, 1.20) | --                   | 0.80 (0.50, 1.26) | --                   | 1.00 (0.72, 1.39) | --                   |
| Male                         | 0.97 (0.67, 1.40) | 0.60                 | 0.83 (0.57, 1.21)        | 0.83                 | 1.01 (0.73, 1.39) | 0.55                 | 1.04 (0.74, 1.46) | 0.27                 | 1.22 (0.88, 1.70) | 0.40                 |

PR: Prevalence ratio (for binary outcomes), CR: Count ratio (for count outcomes); CI: Confidence interval; C: Control; WSH: Water, sanitation, hygiene; N: Nutrition, N+WSH: Nutrition+ water, sanitation, hygiene.

Bolded values refer to estimates with a p-value ≤0.05.

<sup>a</sup> p-value for interaction term between study arm and subgroup variable.

\* Interaction p-values <0.20 indicate significant effect modification.



**Table S15.** Additive interaction by age and sex for unadjusted intervention effects on antibiotic use within last 3 months, Kenya

|                              | WSH vs. C           |                      | N vs. C                     |                      | N+WSH vs. C         |                      | N+WSH vs. WSH       |                      | N+WSH vs. N         |                      |
|------------------------------|---------------------|----------------------|-----------------------------|----------------------|---------------------|----------------------|---------------------|----------------------|---------------------|----------------------|
|                              | PD (95% CI)         | p-value <sup>a</sup> | PD (95% CI)                 | p-value <sup>a</sup> | PD (95% CI)         | p-value <sup>a</sup> | PD (95% CI)         | p-value <sup>a</sup> | PD (95% CI)         | p-value <sup>a</sup> |
| Used antibiotics ≥1 time     |                     |                      |                             |                      |                     |                      |                     |                      |                     |                      |
| All obs                      | -0.02 (-0.08, 0.03) | 0.41                 | -0.02 (-0.07, 0.02)         | 0.33                 | 0.00 (-0.05, 0.05)  | 0.84                 | 0.03 (-0.03, 0.08)  | 0.33                 | 0.03 (-0.03, 0.08)  | 0.32                 |
| Age 6 mo                     | -0.03 (-0.10, 0.04) | --                   | -0.03 (-0.10, 0.04)         | --                   | -0.01 (-0.09, 0.08) | --                   | 0.02 (-0.07, 0.11)  | --                   | 0.03 (-0.06, 0.11)  | --                   |
| Age 17 mo                    | 0.01 (-0.08, 0.10)  | 0.58                 | 0.01 (-0.05, 0.08)          | 0.35                 | 0.02 (-0.05, 0.10)  | 0.62                 | 0.02 (-0.05, 0.09)  | 0.95                 | 0.01 (-0.07, 0.09)  | 0.77                 |
| Age 22 mo                    | -0.05 (-0.13, 0.4)  | 0.75                 | -0.05 (-0.12, 0.02)         | 0.72                 | -0.00 (-0.08, 0.08) | 0.94                 | 0.04 (-0.04, 0.13)  | 0.71                 | 0.05 (-0.03, 0.13)  | 0.68                 |
| Female                       | -0.04 (-0.11, 0.03) | --                   | -0.02 (-0.08, 0.04)         | --                   | -0.00 (-0.08, 0.07) | --                   | 0.03 (-0.04, 0.10)  | --                   | 0.02 (-0.06, 0.09)  | --                   |
| Male                         | -0.01 (-0.08, 0.07) | 0.50                 | -0.02 (-0.09, 0.04)         | 0.99                 | 0.01 (-0.05, 0.07)  | 0.72                 | 0.02 (-0.06, 0.10)  | 0.80                 | 0.04 (-0.02, 0.10)  | 0.67                 |
| Used antibiotics ≥2 times    |                     |                      |                             |                      |                     |                      |                     |                      |                     |                      |
| All obs                      | 0.00 (-0.03, 0.04)  | 0.81                 | -0.02 (-0.05, 0.01)         | 0.30                 | -0.00 (-0.03, 0.03) | 0.84                 | -0.01 (-0.05, 0.03) | 0.73                 | 0.01 (-0.02, 0.05)  | 0.49                 |
| Age 6 mo                     | -0.03 (-0.08, 0.02) | --                   | -0.03 (-0.08, 0.03)         | --                   | -0.02 (-0.08, 0.04) | --                   | 0.01 (-0.06, 0.07)  | --                   | 0.00 (-0.06, 0.07)  | --                   |
| Age 17 mo                    | 0.02 (-0.04, 0.08)  | 0.20                 | 0.00 (-0.05, 0.06)          | 0.48                 | 0.02 (-0.03, 0.07)  | 0.31                 | -0.00 (-0.07, 0.06) | 0.85                 | 0.02 (-0.04, 0.07)  | 0.68                 |
| Age 22 mo                    | 0.02 (-0.04, 0.07)  | 0.17 *               | -0.03 (-0.07, 0.01)         | 0.86                 | -0.01 (-0.06, 0.04) | 0.72                 | -0.03 (-0.08, 0.03) | 0.42                 | 0.02 (-0.02, 0.06)  | 0.55                 |
| Female                       | -0.00 (-0.04, 0.04) | --                   | -0.00 (-0.04, 0.04)         | --                   | -0.00 (-0.05, 0.04) | --                   | -0.00 (-0.04, 0.04) | --                   | -0.00 (-0.05, 0.04) | --                   |
| Male                         | 0.01 (-0.04, 0.07)  | 0.69                 | -0.03 (-0.08, 0.01)         | 0.32                 | -0.00 (-0.04, 0.04) | 0.91                 | -0.01 (-0.08, 0.05) | 0.81                 | 0.03 (-0.02, 0.08)  | 0.28                 |
|                              | CD (95% CI)         | p-value <sup>a</sup> | CD (95% CI)                 | p-value <sup>a</sup> | CD (95% CI)         | p-value <sup>a</sup> | CD (95% CI)         | p-value <sup>a</sup> | CD (95% CI)         | p-value <sup>a</sup> |
| Episodes of antibiotic use   |                     |                      |                             |                      |                     |                      |                     |                      |                     |                      |
| All obs                      | -0.01 (-0.09, 0.07) | 0.77                 | -0.03 (-0.10, 0.05)         | 0.44                 | 0.01 (-0.06, 0.09)  | 0.67                 | 0.03 (-0.06, 0.12)  | 0.56                 | 0.05 (-0.05, 0.14)  | 0.34                 |
| Age 6 mo                     | -0.06 (-0.17, 0.05) | --                   | -0.04 (-0.18, 0.10)         | --                   | -0.03 (-0.17, 0.12) | --                   | 0.03 (-0.13, 0.19)  | --                   | 0.01 (-0.14, 0.17)  | --                   |
| Age 17 mo                    | 0.04 (-0.10, 0.17)  | 0.31                 | 0.03 (-0.08, 0.13)          | 0.41                 | 0.07 (-0.04, 0.18)  | 0.32                 | 0.03 (-0.10, 0.16)  | 1.00                 | 0.04 (-0.08, 0.16)  | 0.78                 |
| Age 22 mo                    | -0.02 (-0.15, 0.10) | 0.67                 | -0.08 (-0.18, 0.01)         | 0.57                 | -0.01 (-0.11, 0.10) | 0.82                 | 0.02 (-0.11, 0.15)  | 0.89                 | 0.08 (-0.03, 0.18)  | 0.45                 |
| Female                       | -0.02 (-0.12, 0.07) | --                   | -0.01 (-0.10, 0.08)         | --                   | 0.01 (-0.10, 0.12)  | --                   | 0.04 (-0.07, 0.14)  | --                   | 0.02 (-0.10, 0.14)  | --                   |
| Male                         | 0.01 (-0.11, 0.12)  | 0.64                 | -0.05 (-0.16, 0.06)         | 0.53                 | 0.03 (-0.07, 0.12)  | 0.83                 | 0.02 (-0.12, 0.16)  | 0.85                 | 0.07 (-0.03, 0.18)  | 0.43                 |
| Total days of antibiotic use |                     |                      |                             |                      |                     |                      |                     |                      |                     |                      |
| All obs                      | 0.19 (-1.37, 1.76)  | 0.81                 | -0.59 (-1.61, 0.43)         | 0.25                 | -0.24 (-1.08, 0.60) | 0.58                 | -0.43 (-1.81, 0.94) | 0.53                 | 0.34 (-0.48, 1.18)  | 0.41                 |
| Age 6 mo                     | -1.55 (-4.27, 1.17) | --                   | <b>-2.71 (-4.88, -0.53)</b> | --                   | -1.67 (-4.16, 0.81) | --                   | -0.13 (-1.91, 1.66) | --                   | 1.03 (-0.20, 2.26)  | --                   |
| Age 17 mo                    | 1.95 (-1.47, 5.37)  | 0.11 *               | 0.73 (-1.08, 2.54)          | 0.02 *               | 0.14 (-1.03, 1.31)  | 0.26                 | -1.81 (-5.22, 1.60) | 0.37                 | -0.59 (-2.30, 1.12) | 0.15 *               |
| Age 22 mo                    | 0.00 (-0.72, 0.73)  | 0.27                 | 0.04 (-0.84, 0.93)          | 0.03 *               | 0.66 (-0.35, 1.67)  | 0.09 *               | 0.66 (-0.32, 1.63)  | 0.47                 | 0.62 (0.46, 1.70)   | 0.58                 |
| Female                       | 0.43 (-1.79, 2.64)  | --                   | -0.51 (-1.84, 0.82)         | --                   | -0.50 (-1.72, 0.72) | --                   | -0.93 (-2.92, 1.06) | --                   | 0.01 (-1.16, 1.18)  | --                   |
| Male                         | -0.12 (-1.50, 1.27) | 0.61                 | -0.65 (-1.99, 0.69)         | 0.88                 | 0.04 (-1.18, 1.26)  | 0.54                 | 0.16 (-1.11, 1.42)  | 0.29                 | 0.69 (-0.47, 1.85)  | 0.41                 |

PD: Prevalence difference (for binary outcomes); CD: Count difference (for count outcomes); CI: Confidence interval; C: Control; WSH: Water, sanitation, hygiene; N: Nutrition, N+WSH: Nutrition+ water, sanitation, hygiene.

Bolded values refer to estimates with a p-value ≤0.05.

<sup>a</sup> Interaction p-value between study arm and subgroup variable.

\* Interaction p-values <0.20 indicate significant effect modification.

**Table S16.** Sensitivity analysis, unadjusted intervention effects on antibiotic use within last 2 weeks and last month, Bangladesh\*

| Arm                                                                | N    | % (n)      | Compared to C     |         | Compared to WSH   |         | Compared to N     |         |
|--------------------------------------------------------------------|------|------------|-------------------|---------|-------------------|---------|-------------------|---------|
|                                                                    |      |            | PR (95% CI)       | p-value | PR (95% CI)       | p-value | PR (95% CI)       | p-value |
| <b>Bangladesh</b>                                                  |      |            |                   |         |                   |         |                   |         |
| <b>Used antibiotics <math>\geq 1</math> time in last two weeks</b> |      |            |                   |         |                   |         |                   |         |
| C                                                                  | 1000 | 21.5 (215) | --                | --      | --                | --      | --                | --      |
| WSH                                                                | 1076 | 22.1 (238) | 1.03 (0.84, 1.26) | 0.79    | --                | --      | --                | --      |
| N                                                                  | 1014 | 19.9 (202) | 0.93 (0.77, 1.11) | 0.42    | --                | --      | --                | --      |
| N+WSH                                                              | 1050 | 19.2 (202) | 0.89 (0.73, 1.10) | 0.29    | 0.87 (0.72, 1.06) | 0.16    | 0.97 (0.78, 1.19) | 0.74    |
| <b>Used antibiotics <math>\geq 1</math> time in last month</b>     |      |            |                   |         |                   |         |                   |         |
| C                                                                  | 1000 | 48.2 (482) | --                | --      | --                | --      | --                | --      |
| WSH                                                                | 1076 | 43.2 (465) | 0.90 (0.81, 0.99) | 0.03    | --                | --      | --                | --      |
| N                                                                  | 1014 | 40.4 (410) | 0.84 (0.76, 0.93) | <0.001  | --                | --      | --                | --      |
| N+WSH                                                              | 1050 | 42.3 (444) | 0.88 (0.79, 0.97) | 0.01    | 0.98 (0.88, 1.08) | 0.67    | 1.05 (0.93, 1.18) | 0.45    |

PR: Prevalence ratio; CI: Confidence interval; C: Control; WSH: Water, sanitation, hygiene; N: Nutrition, N+WSH: Nutrition+ water, sanitation, hygiene.

\* Not conducted for Kenya because the survey question for this variable in Kenya was designed to also capture non-antibiotic medications.

**Figure S1.** CONSORT Diagram for the WASH Benefits Bangladesh environmental enteric dysfunction substudy

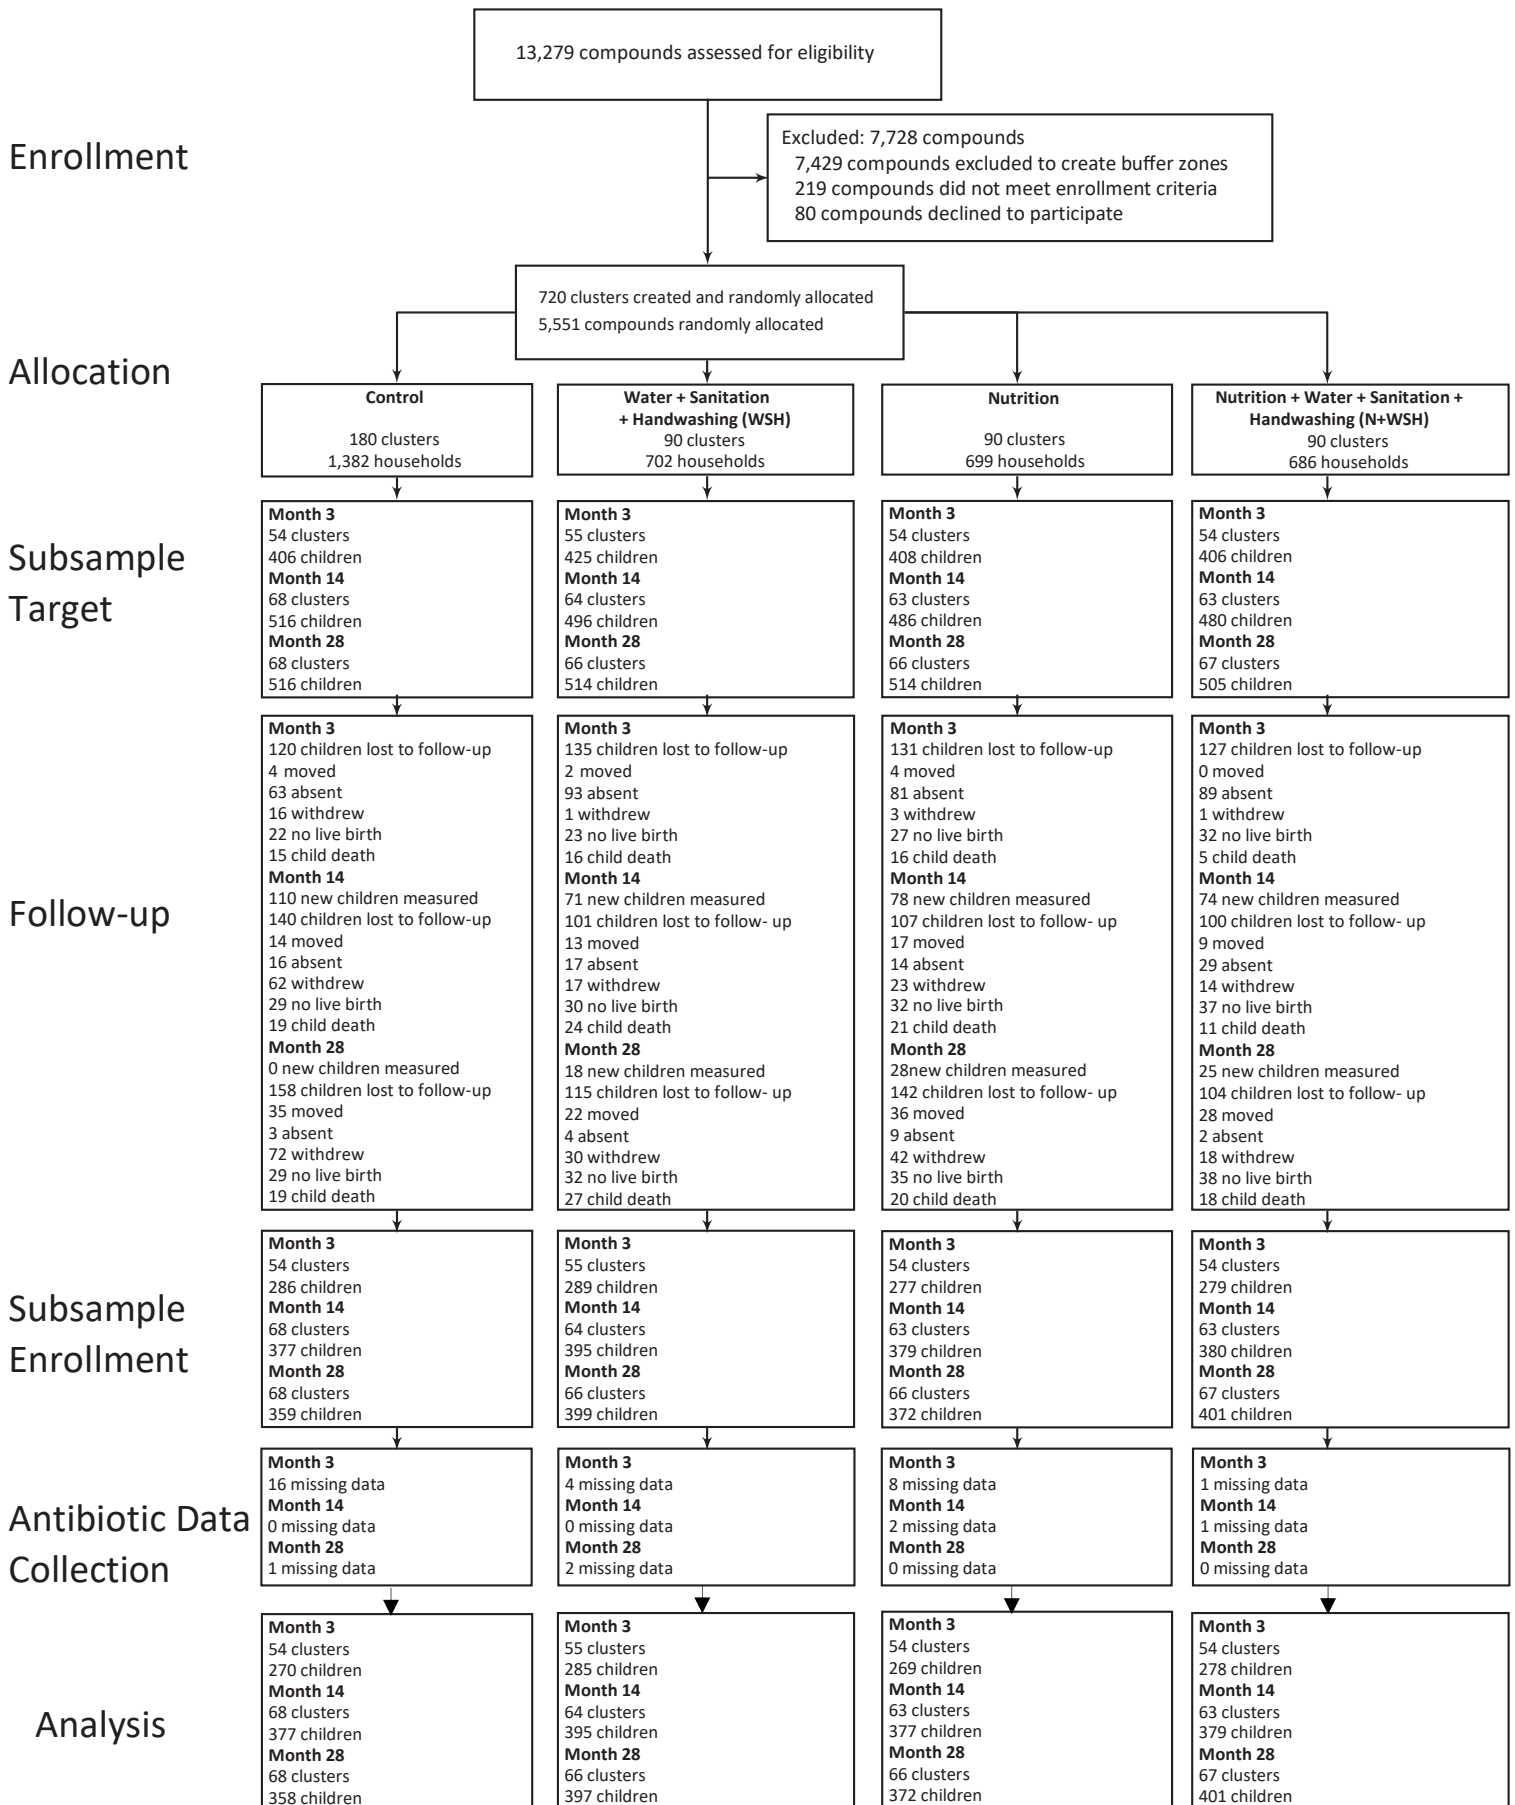

**Figure S2.** CONSORT Diagram for the WASH Benefits Kenya environmental enteric dysfunction substudy

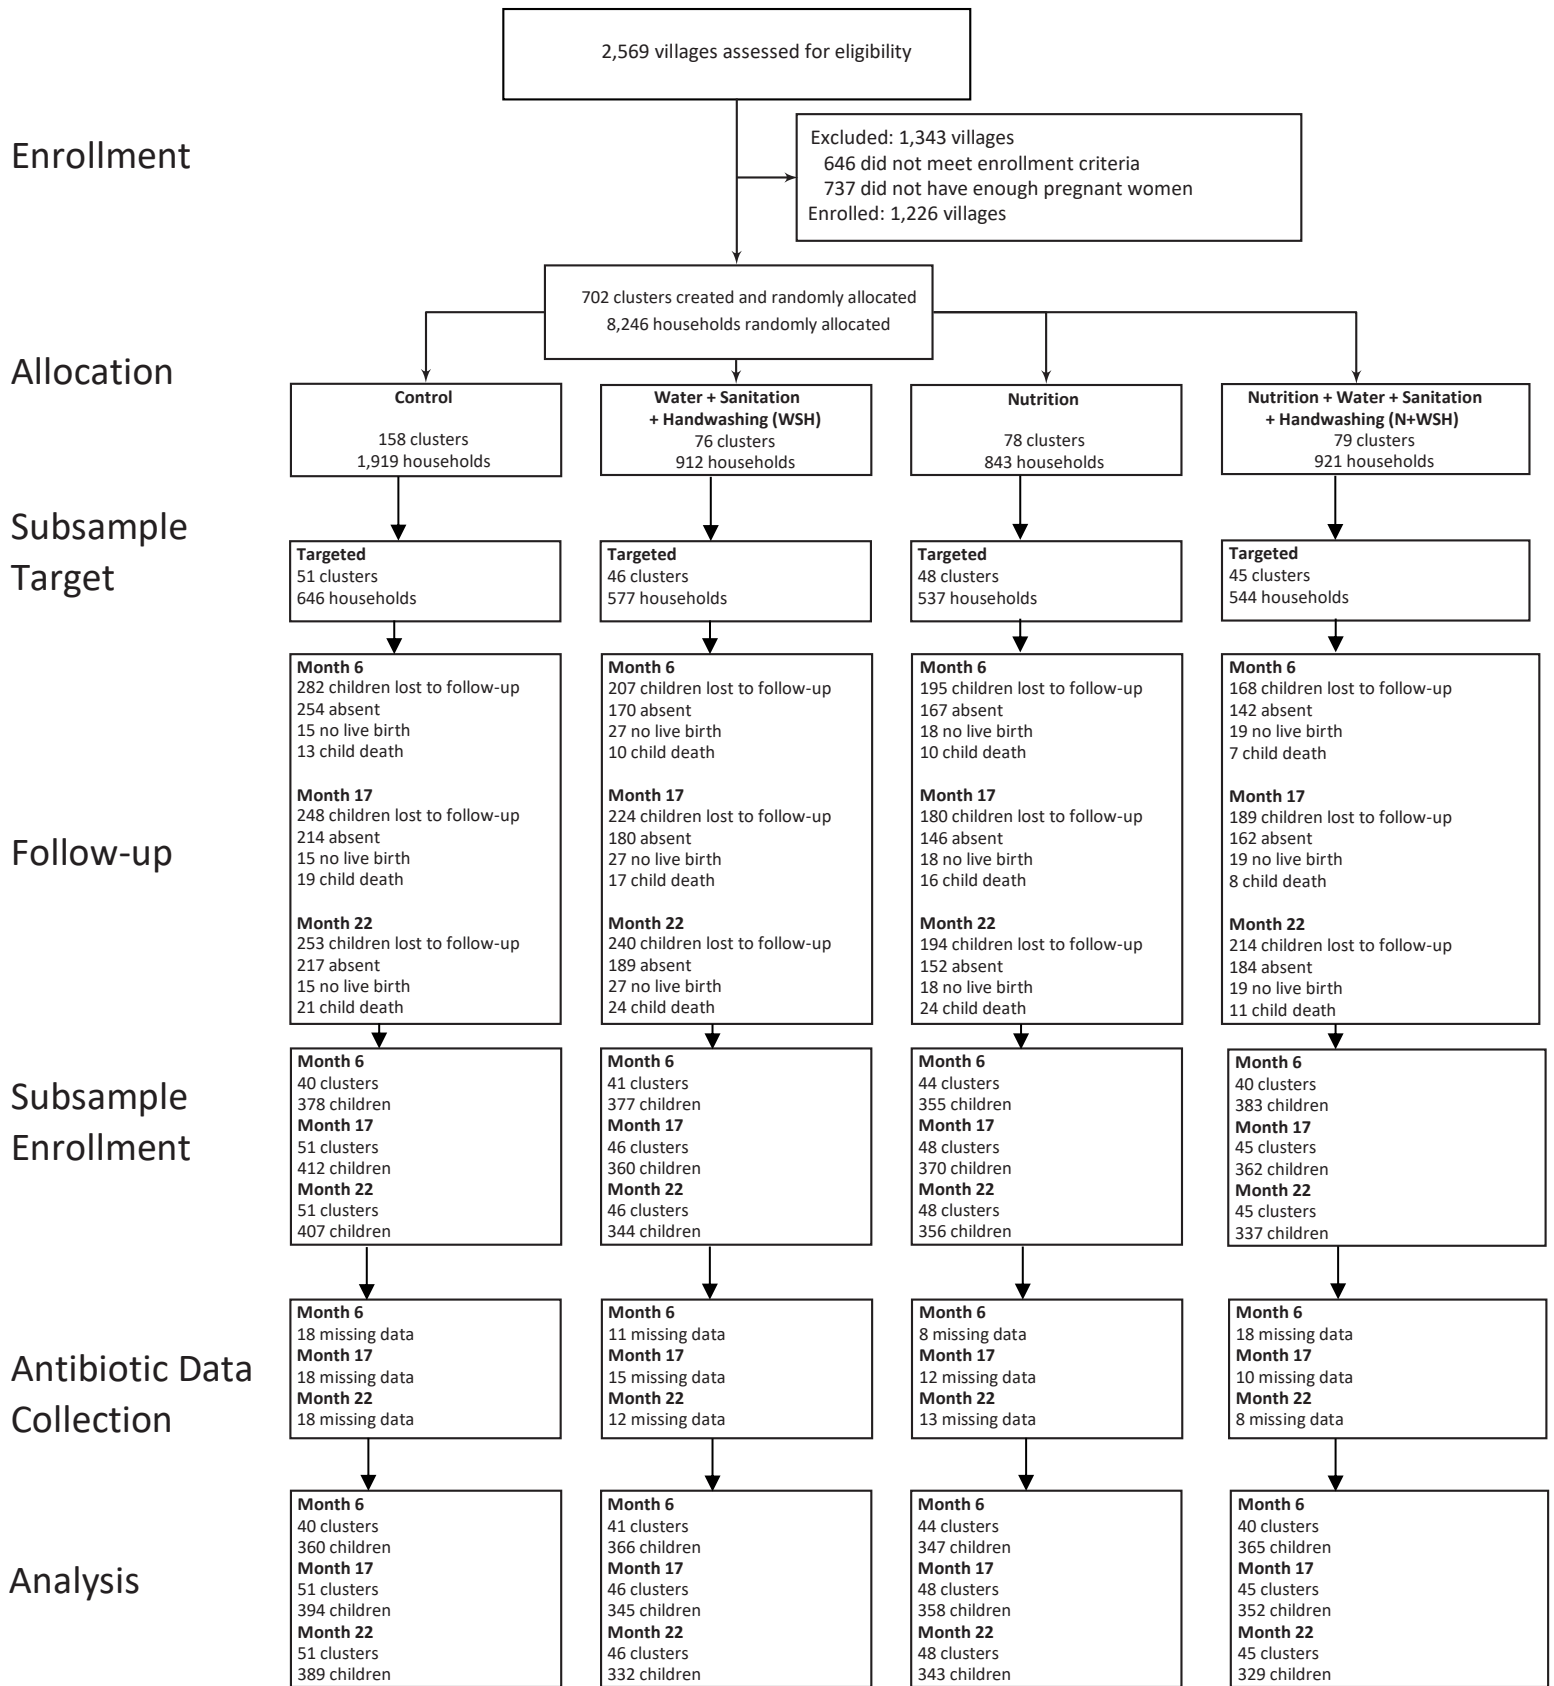

Supplement: Supplementary file [file media-1.pdf]
